# Supplementary material for: High-throughput identification of materials for silicon tandem solar cells
Source: Royal Society of Chemistry journal article supplement (doi:10.1039/d2se01350a), 2023-01-01

## High-Throughput Identification of Materials for Si Tandem Solar Cells – Supplementary Information

Yanzhen Zhao,<sup>a</sup> Zhikun Yao,<sup>a</sup> Chang Liu,<sup>a</sup> Wei Ren,<sup>a,b</sup> Geoffroy Hautier<sup>c</sup> and Lee A. Burton<sup>\*a,d</sup>

Table S1. The band gap values (eV) of 881 candidates calculated by HSE.

| Number | Materials<br>Project ID | Material           | Gap  | Number | Materials<br>Project ID | Material           | Gap  |
|--------|-------------------------|--------------------|------|--------|-------------------------|--------------------|------|
| 1      | mp-74                   | Rh                 | 0.00 | 34     | mp-1380                 | Zn <sub>3</sub> Ru | 0.00 |
| 2      | mp-101                  | Ir                 | 0.00 | 35     | mp-1534                 | YS                 | 0.00 |
| 3      | mp-190                  | ReO <sub>3</sub>   | 0.00 | 36     | mp-1540                 | HoTl               | 0.00 |
| 4      | mp-246                  | TiF <sub>3</sub>   | 0.00 | 37     | mp-1548                 | PrMg               | 0.00 |
| 5      | mp-265                  | TaIr <sub>3</sub>  | 0.00 | 38     | mp-1597                 | UO <sub>2</sub>    | 0.00 |
| 6      | mp-429                  | ZnNi               | 0.00 | 39     | mp-1610                 | TbS                | 0.00 |
| 7      | mp-572                  | SmCd               | 0.00 | 40     | mp-1623                 | ErS                | 0.00 |
| 8      | mp-615                  | YMg                | 0.00 | 41     | mp-1630                 | Zr <sub>3</sub> Hg | 0.00 |
| 9      | mp-635                  | ScRh <sub>3</sub>  | 0.00 | 42     | mp-1635                 | TbMg               | 0.00 |
| 10     | mp-646                  | PrCd               | 0.00 | 43     | mp-1766                 | TmS                | 0.00 |
| 11     | mp-656                  | LuS                | 0.00 | 44     | mp-1782                 | ScSe               | 0.00 |
| 12     | mp-702                  | CeHg               | 0.00 | 45     | mp-1842                 | NbAl <sub>3</sub>  | 0.00 |
| 13     | mp-734                  | LaHg               | 0.00 | 46     | mp-1857                 | YbCd               | 0.00 |
| 14     | mp-771                  | MnAl               | 0.00 | 47     | mp-1921                 | ThTe               | 0.00 |
| 15     | mp-776                  | LaCd               | 0.00 | 48     | mp-1948                 | LaAg               | 0.00 |
| 16     | mp-869                  | TaAl <sub>3</sub>  | 0.00 | 49     | mp-1959                 | PuO <sub>2</sub>   | 0.00 |
| 17     | mp-873                  | VPd <sub>3</sub>   | 0.00 | 50     | mp-1973                 | NbGa <sub>3</sub>  | 0.00 |
| 18     | mp-922                  | CoPt <sub>3</sub>  | 0.00 | 51     | mp-2011                 | UP                 | 0.00 |
| 19     | mp-945                  | NiPt               | 0.00 | 52     | mp-2052                 | ScAs               | 0.00 |
| 20     | mp-953                  | NbZn <sub>3</sub>  | 0.00 | 53     | mp-2053                 | Nb <sub>3</sub> Sb | 0.00 |
| 21     | mp-1020                 | TaRh <sub>3</sub>  | 0.00 | 54     | mp-2070                 | CoS <sub>2</sub>   | 0.00 |
| 22     | mp-1027                 | HfRh <sub>3</sub>  | 0.00 | 55     | mp-2077                 | DyMg               | 0.00 |
| 23     | mp-1059                 | NdCd               | 0.00 | 56     | mp-2082                 | PIr <sub>2</sub>   | 0.00 |
| 24     | mp-1073                 | CaCd               | 0.00 | 57     | mp-2260                 | FePt               | 0.00 |
| 25     | mp-1089                 | TiIr <sub>3</sub>  | 0.00 | 58     | mp-2291                 | Si <sub>2</sub> Ni | 0.00 |
| 26     | mp-1113                 | BW <sub>2</sub>    | 0.00 | 59     | mp-2364                 | PaO <sub>2</sub>   | 0.00 |
| 27     | mp-1144                 | ErP                | 0.00 | 60     | mp-2367                 | LaC <sub>2</sub>   | 0.00 |
| 28     | mp-1152                 | TiRh <sub>3</sub>  | 0.00 | 61     | mp-2379                 | CoSi <sub>2</sub>  | 0.00 |
| 29     | mp-1164                 | ThC                | 0.00 | 62     | mp-2423                 | US                 | 0.00 |
| 30     | mp-1180                 | MnPt <sub>3</sub>  | 0.00 | 63     | mp-2459                 | YbIn               | 0.00 |
| 31     | mp-1240                 | HoS                | 0.00 | 64     | mp-2470                 | DyS                | 0.00 |
| 32     | mp-1326                 | Nb <sub>3</sub> Sn | 0.00 | 65     | mp-2525                 | PrAg               | 0.00 |
| 33     | mp-1327                 | NdMg               | 0.00 | 66     | mp-2558                 | SmMg               | 0.00 |

|     |         |                                  |      |     |         |                                                    |      |
|-----|---------|----------------------------------|------|-----|---------|----------------------------------------------------|------|
| 67  | mp-2616 | NpO <sub>2</sub>                 | 0.00 | 110 | mp-4881 | Er(SiNi) <sub>2</sub>                              | 0.00 |
| 68  | mp-2636 | GdMg                             | 0.00 | 111 | mp-4883 | Ba(FeP) <sub>2</sub>                               | 0.00 |
| 69  | mp-2678 | VPt                              | 0.00 | 112 | mp-4903 | Tm(CuSi) <sub>2</sub>                              | 0.00 |
| 70  | mp-2705 | VPt <sub>3</sub>                 | 0.00 | 113 | mp-4973 | CeSF                                               | 0.00 |
| 71  | mp-2731 | TiGa <sub>3</sub>                | 0.00 | 114 | mp-4985 | Dy(MnSi) <sub>2</sub>                              | 0.00 |
| 72  | mp-2732 | PRh <sub>2</sub>                 | 0.00 | 115 | mp-4998 | Sr <sub>2</sub> IrO <sub>4</sub>                   | 0.00 |
| 73  | mp-2807 | ScP                              | 0.00 | 116 | mp-5000 | Tl(CuSe) <sub>2</sub>                              | 0.00 |
| 74  | mp-2861 | CaTl                             | 0.00 | 117 | mp-5054 | Pr(CoP) <sub>2</sub>                               | 0.00 |
| 75  | mp-2906 | Ho(NiP) <sub>2</sub>             | 0.00 | 118 | mp-5112 | Pr(CoSi) <sub>2</sub>                              | 0.00 |
| 76  | mp-2924 | Ho(SiNi) <sub>2</sub>            | 0.00 | 119 | mp-5129 | Y(CoSi) <sub>2</sub>                               | 0.00 |
| 77  | mp-2938 | Tm(FeSi) <sub>2</sub>            | 0.00 | 120 | mp-5150 | HoSi <sub>2</sub> Ni                               | 0.00 |
| 78  | mp-2958 | Dy(BC) <sub>2</sub>              | 0.00 | 121 | mp-5227 | Dy(NiP) <sub>2</sub>                               | 0.00 |
| 79  | mp-3129 | ScSi <sub>3</sub> Ni             | 0.00 | 122 | mp-5268 | U <sub>2</sub> SbN <sub>2</sub>                    | 0.00 |
| 80  | mp-3191 | Ho(FeSi) <sub>2</sub>            | 0.00 | 123 | mp-5326 | Yb(CoSi) <sub>2</sub>                              | 0.00 |
| 81  | mp-3208 | ZrGeTe                           | 0.00 | 124 | mp-5346 | Lu(CuSi) <sub>2</sub>                              | 0.00 |
| 82  | mp-3210 | Ca(CoP) <sub>2</sub>             | 0.00 | 125 | mp-5451 | Er(FeGe) <sub>2</sub>                              | 0.00 |
| 83  | mp-3239 | Er(CoSi) <sub>2</sub>            | 0.00 | 126 | mp-5497 | Er(CoGe) <sub>2</sub>                              | 0.00 |
| 84  | mp-3262 | Tm(CoSi) <sub>2</sub>            | 0.00 | 127 | mp-5505 | U <sub>2</sub> TeN <sub>2</sub>                    | 0.00 |
| 85  | mp-3292 | Tb(CoSi) <sub>2</sub>            | 0.00 | 128 | mp-5517 | Tb(NiP) <sub>2</sub>                               | 0.00 |
| 86  | mp-3299 | Sr(FeP) <sub>2</sub>             | 0.00 | 129 | mp-5529 | MnFe <sub>2</sub> Si                               | 0.00 |
| 87  | mp-3402 | UTeN                             | 0.00 | 130 | mp-5597 | Ca(FeP) <sub>2</sub>                               | 0.00 |
| 88  | mp-3437 | Ce(CoSi) <sub>2</sub>            | 0.00 | 131 | mp-5622 | Nd(CoP) <sub>2</sub>                               | 0.00 |
| 89  | mp-3455 | Er(NiP) <sub>2</sub>             | 0.00 | 132 | mp-5666 | Ho(MnGe) <sub>2</sub>                              | 0.00 |
| 90  | mp-3587 | Sc(SiNi) <sub>2</sub>            | 0.00 | 133 | mp-5671 | Sr(CoP) <sub>2</sub>                               | 0.00 |
| 91  | mp-3758 | Eu(NiP) <sub>2</sub>             | 0.00 | 134 | mp-5677 | Tb(MnSi) <sub>2</sub>                              | 0.00 |
| 92  | mp-3799 | GdSF                             | 0.00 | 135 | mp-5688 | Er(FeSi) <sub>2</sub>                              | 0.00 |
| 93  | mp-3854 | Y(MnSi) <sub>2</sub>             | 0.00 | 136 | mp-5765 | Nd(BC) <sub>2</sub>                                | 0.00 |
| 94  | mp-4064 | Ca(NiP) <sub>2</sub>             | 0.00 | 137 | mp-5796 | Ho(MnSi) <sub>2</sub>                              | 0.00 |
| 95  | mp-4105 | Ho(CuSi) <sub>2</sub>            | 0.00 | 138 | mp-5820 | Ce(CoP) <sub>2</sub>                               | 0.00 |
| 96  | mp-4228 | Nd(CoSi) <sub>2</sub>            | 0.00 | 139 | mp-5835 | Ho(CoSi) <sub>2</sub>                              | 0.00 |
| 97  | mp-4305 | Er(CuSi) <sub>2</sub>            | 0.00 | 140 | mp-5976 | Dy(CoSi) <sub>2</sub>                              | 0.00 |
| 98  | mp-4374 | UAsS                             | 0.00 | 141 | mp-5983 | Tm(CoGe) <sub>2</sub>                              | 0.00 |
| 99  | mp-4415 | Ho(CoGe) <sub>2</sub>            | 0.00 | 142 | mp-5992 | LaB <sub>2</sub> Ir <sub>2</sub> C                 | 0.00 |
| 100 | mp-4469 | Tm(SiNi) <sub>2</sub>            | 0.00 | 143 | mp-6191 | CeB <sub>2</sub> Rh <sub>2</sub> C                 | 0.00 |
| 101 | mp-4487 | Er(MnGe) <sub>2</sub>            | 0.00 | 144 | mp-6205 | Ba <sub>2</sub> Ho(CuO <sub>2</sub> ) <sub>4</sub> | 0.00 |
| 102 | mp-4492 | MnCo <sub>2</sub> Si             | 0.00 | 145 | mp-6583 | Ba <sub>2</sub> Er(CuO <sub>2</sub> ) <sub>4</sub> | 0.00 |
| 103 | mp-4574 | YbTaO <sub>4</sub>               | 0.00 | 146 | mp-6691 | Ba <sub>2</sub> Dy(CuO <sub>2</sub> ) <sub>4</sub> | 0.00 |
| 104 | mp-4593 | Mn <sub>3</sub> AlC              | 0.00 | 147 | mp-6710 | Ba <sub>2</sub> Tm(CuO <sub>2</sub> ) <sub>4</sub> | 0.00 |
| 105 | mp-4595 | VFe <sub>2</sub> Si              | 0.00 | 148 | mp-6779 | Ba <sub>2</sub> Pr(CuO <sub>2</sub> ) <sub>4</sub> | 0.00 |
| 106 | mp-4596 | Sr <sub>2</sub> RuO <sub>4</sub> | 0.00 | 149 | mp-6790 | Ba <sub>2</sub> Y(CuO <sub>2</sub> ) <sub>4</sub>  | 0.00 |
| 107 | mp-4729 | Er(MnSi) <sub>2</sub>            | 0.00 | 150 | mp-6794 | LaB <sub>2</sub> Rh <sub>2</sub> C                 | 0.00 |
| 108 | mp-4860 | Gd <sub>2</sub> CuO <sub>4</sub> | 0.00 | 151 | mp-6916 | Sm(BC) <sub>2</sub>                                | 0.00 |
| 109 | mp-4875 | GdTlO <sub>4</sub>               | 0.00 | 152 | mp-6956 | La(FeP) <sub>2</sub>                               | 0.00 |

|     |          |                                    |      |     |          |                                                    |      |
|-----|----------|------------------------------------|------|-----|----------|----------------------------------------------------|------|
| 153 | mp-6957  | Ce(FeP) <sub>2</sub>               | 0.00 | 196 | mp-11578 | VZn <sub>3</sub>                                   | 0.00 |
| 154 | mp-6969  | Sc(CuSi) <sub>2</sub>              | 0.00 | 197 | mp-12083 | CrIr <sub>3</sub>                                  | 0.00 |
| 155 | mp-7171  | TmP                                | 0.00 | 198 | mp-12098 | K(PRh) <sub>2</sub>                                | 0.00 |
| 156 | mp-7194  | TbCuAs <sub>2</sub>                | 0.00 | 199 | mp-12100 | Lu(SiNi) <sub>2</sub>                              | 0.00 |
| 157 | mp-7298  | Li(CuP) <sub>2</sub>               | 0.00 | 200 | mp-12266 | CaCuF <sub>4</sub>                                 | 0.00 |
| 158 | mp-7349  | Ba(BRh) <sub>2</sub>               | 0.00 | 201 | mp-12382 | ErSi <sub>2</sub> Ni                               | 0.00 |
| 159 | mp-7818  | Pd <sub>4</sub> Se                 | 0.00 | 202 | mp-12585 | CrRh <sub>3</sub>                                  | 0.00 |
| 160 | mp-8137  | NpSO                               | 0.00 | 203 | mp-12593 | ScIr <sub>3</sub>                                  | 0.00 |
| 161 | mp-8761  | NdCoC <sub>2</sub>                 | 0.00 | 204 | mp-12599 | PrTl                                               | 0.00 |
| 162 | mp-9075  | CdCuF <sub>4</sub>                 | 0.00 | 205 | mp-12625 | U <sub>2</sub> TeO <sub>2</sub>                    | 0.00 |
| 163 | mp-9463  | ZrGeSb                             | 0.00 | 206 | mp-13473 | Sm(MnSi) <sub>2</sub>                              | 0.00 |
| 164 | mp-9473  | Ba(NiP) <sub>2</sub>               | 0.00 | 207 | mp-13914 | LiCo <sub>2</sub> Ge                               | 0.00 |
| 165 | mp-9913  | Fe <sub>3</sub> B <sub>2</sub> P   | 0.00 | 208 | mp-13964 | HfGeTe                                             | 0.00 |
| 166 | mp-9930  | UPSe                               | 0.00 | 209 | mp-15039 | Ba <sub>2</sub> Yb(CuO <sub>2</sub> ) <sub>4</sub> | 0.00 |
| 167 | mp-10108 | NpP                                | 0.00 | 210 | mp-15617 | Cr <sub>3</sub> B <sub>3</sub>                     | 0.00 |
| 168 | mp-10109 | NpS                                | 0.00 | 211 | mp-15780 | MgPPT <sub>5</sub>                                 | 0.00 |
| 169 | mp-10181 | LiSiNi <sub>2</sub>                | 0.00 | 212 | mp-15805 | Mn <sub>3</sub> ZnN                                | 0.00 |
| 170 | mp-10192 | LuP                                | 0.00 | 213 | mp-15968 | Sm(CoSi) <sub>2</sub>                              | 0.00 |
| 171 | mp-10270 | ScCo <sub>3</sub> C                | 0.00 | 214 | mp-16315 | GePt <sub>3</sub>                                  | 0.00 |
| 172 | mp-10350 | BaNdCuBO <sub>5</sub>              | 0.00 | 215 | mp-16334 | Fe <sub>3</sub> PdN                                | 0.00 |
| 173 | mp-10374 | Cr <sub>3</sub> PtN                | 0.00 | 216 | mp-18331 | GdCrO <sub>3</sub>                                 | 0.00 |
| 174 | mp-10564 | SrN <sub>2</sub>                   | 0.00 | 217 | mp-18725 | YCrO <sub>3</sub>                                  | 0.00 |
| 175 | mp-10852 | La(BC) <sub>2</sub>                | 0.00 | 218 | mp-19007 | V <sub>2</sub> PO <sub>5</sub>                     | 0.00 |
| 176 | mp-10853 | Pr(BC) <sub>2</sub>                | 0.00 | 219 | mp-19102 | Sr <sub>2</sub> FeO <sub>4</sub>                   | 0.00 |
| 177 | mp-10854 | Tb(BC) <sub>2</sub>                | 0.00 | 220 | mp-19269 | NdCrO <sub>3</sub>                                 | 0.00 |
| 178 | mp-10856 | Er(BC) <sub>2</sub>                | 0.00 | 221 | mp-19281 | LaCrO <sub>3</sub>                                 | 0.00 |
| 179 | mp-10964 | CeB <sub>2</sub> Ir <sub>2</sub> C | 0.00 | 222 | mp-19722 | MnCu <sub>2</sub> SnS <sub>4</sub>                 | 0.00 |
| 180 | mp-10991 | YCuAs <sub>2</sub>                 | 0.00 | 223 | mp-19756 | GdB <sub>2</sub> Rh <sub>2</sub> C                 | 0.00 |
| 181 | mp-10992 | DyCuAs <sub>2</sub>                | 0.00 | 224 | mp-19815 | Eu <sub>2</sub> VO <sub>4</sub>                    | 0.00 |
| 182 | mp-10993 | ErCuAs <sub>2</sub>                | 0.00 | 225 | mp-19819 | GdIn                                               | 0.00 |
| 183 | mp-10994 | TmCuAs <sub>2</sub>                | 0.00 | 226 | mp-19966 | GdTl                                               | 0.00 |
| 184 | mp-11263 | Zr <sub>3</sub> Au                 | 0.00 | 227 | mp-20023 | PrIn                                               | 0.00 |
| 185 | mp-11286 | CaHg                               | 0.00 | 228 | mp-20025 | Mn(GaS <sub>2</sub> ) <sub>2</sub>                 | 0.00 |
| 186 | mp-11374 | DyTl                               | 0.00 | 229 | mp-20095 | Eu(FeP) <sub>2</sub>                               | 0.00 |
| 187 | mp-11375 | EuHg                               | 0.00 | 230 | mp-20188 | GdCuAs <sub>2</sub>                                | 0.00 |
| 188 | mp-11387 | HfGa <sub>3</sub>                  | 0.00 | 231 | mp-20263 | CaIn                                               | 0.00 |
| 189 | mp-11416 | TaGa <sub>3</sub>                  | 0.00 | 232 | mp-20264 | Tb(FeGe) <sub>2</sub>                              | 0.00 |
| 190 | mp-11467 | NdHg                               | 0.00 | 233 | mp-20298 | SmIn                                               | 0.00 |
| 191 | mp-11469 | PrHg                               | 0.00 | 234 | mp-20410 | Ho(BC) <sub>2</sub>                                | 0.00 |
| 192 | mp-11504 | MnZn <sub>3</sub>                  | 0.00 | 235 | mp-20422 | KMnP                                               | 0.00 |
| 193 | mp-11517 | NbRu <sub>3</sub>                  | 0.00 | 236 | mp-20431 | Ca <sub>2</sub> FeSbO <sub>6</sub>                 | 0.00 |
| 194 | mp-11575 | YTl                                | 0.00 | 237 | mp-20553 | GdMnSi                                             | 0.00 |
| 195 | mp-11576 | YbTl                               | 0.00 | 238 | mp-20596 | U(SiNi) <sub>2</sub>                               | 0.00 |

|     |          |                                                                  |      |     |           |                                                                                  |      |
|-----|----------|------------------------------------------------------------------|------|-----|-----------|----------------------------------------------------------------------------------|------|
| 239 | mp-20614 | EuMnO <sub>3</sub>                                               | 0.00 | 282 | mp-29797  | GdBrO                                                                            | 0.00 |
| 240 | mp-20649 | Y(MnGe) <sub>2</sub>                                             | 0.00 | 283 | mp-30147  | ZrTiAs                                                                           | 0.00 |
| 241 | mp-20908 | Ce(BC) <sub>2</sub>                                              | 0.00 | 284 | mp-30682  | ZrGa                                                                             | 0.00 |
| 242 | mp-20913 | UGeS                                                             | 0.00 | 285 | mp-30836  | TaPd <sub>3</sub>                                                                | 0.00 |
| 243 | mp-20937 | Cr <sub>3</sub> C <sub>2</sub>                                   | 0.00 | 286 | mp-30856  | ZnPt <sub>3</sub>                                                                | 0.00 |
| 244 | mp-20947 | CaRuO <sub>3</sub>                                               | 0.00 | 287 | mp-30871  | Ta <sub>3</sub> Sn                                                               | 0.00 |
| 245 | mp-21000 | Dy(MnGe) <sub>2</sub>                                            | 0.00 | 288 | mp-30878  | TbTl                                                                             | 0.00 |
| 246 | mp-21289 | TiZn <sub>3</sub>                                                | 0.00 | 289 | mp-31054  | La <sub>3</sub> (VN <sub>3</sub> ) <sub>2</sub>                                  | 0.00 |
| 247 | mp-21298 | NpSi <sub>2</sub>                                                | 0.00 | 290 | mp-31138  | MnPd <sub>3</sub>                                                                | 0.00 |
| 248 | mp-21302 | Sr <sub>2</sub> MnGaO <sub>5</sub>                               | 0.00 | 291 | mp-37014  | GdPaO <sub>4</sub>                                                               | 0.00 |
| 249 | mp-21313 | Mn <sub>3</sub> GaC                                              | 0.00 | 292 | mp-37297  | U <sub>2</sub> PS                                                                | 0.00 |
| 250 | mp-21364 | HoCuAs <sub>2</sub>                                              | 0.00 | 293 | mp-39159  | CaLaTiCrO <sub>6</sub>                                                           | 0.00 |
| 251 | mp-21429 | U(CoSi) <sub>2</sub>                                             | 0.00 | 294 | mp-40630  | CaPrMn <sub>2</sub> O <sub>6</sub>                                               | 0.00 |
| 252 | mp-21471 | LiFeAs                                                           | 0.00 | 295 | mp-505820 | NiPS                                                                             | 0.00 |
| 253 | mp-21473 | Gd(NiP) <sub>2</sub>                                             | 0.00 | 296 | mp-510402 | GdS                                                                              | 0.00 |
| 254 | mp-21845 | FePd <sub>3</sub>                                                | 0.00 | 297 | mp-510624 | SrFeO <sub>3</sub>                                                               | 0.00 |
| 255 | mp-22106 | NdNiO <sub>3</sub>                                               | 0.00 | 298 | mp-542915 | TiAl <sub>3</sub>                                                                | 0.00 |
| 256 | mp-22152 | NaFeAs                                                           | 0.00 | 299 | mp-542985 | Gd(CoSi) <sub>2</sub>                                                            | 0.00 |
| 257 | mp-22159 | UNiAs <sub>2</sub>                                               | 0.00 | 300 | mp-545481 | Ca <sub>2</sub> Cu(BrO) <sub>2</sub>                                             | 0.00 |
| 258 | mp-22280 | PrNiO <sub>3</sub>                                               | 0.00 | 301 | mp-545847 | LuBi <sub>2</sub> BrO <sub>4</sub>                                               | 0.00 |
| 259 | mp-22306 | Eu <sub>2</sub> CuO <sub>4</sub>                                 | 0.00 | 302 | mp-546295 | Sr <sub>2</sub> CuOsO <sub>6</sub>                                               | 0.00 |
| 260 | mp-22374 | U(CuSi) <sub>2</sub>                                             | 0.00 | 303 | mp-549695 | GdBi <sub>2</sub> ClO <sub>4</sub>                                               | 0.00 |
| 261 | mp-22486 | Tb(MnGe) <sub>2</sub>                                            | 0.00 | 304 | mp-550306 | YCu <sub>2</sub> Bi <sub>2</sub> (SeO <sub>2</sub> ) <sub>2</sub>                | 0.00 |
| 262 | mp-22495 | SmNiO <sub>3</sub>                                               | 0.00 | 305 | mp-550566 | EuBi <sub>2</sub> ClO <sub>4</sub>                                               | 0.00 |
| 263 | mp-23019 | UNCl                                                             | 0.00 | 306 | mp-550805 | LuBi <sub>2</sub> ClO <sub>4</sub>                                               | 0.00 |
| 264 | mp-23085 | Ba <sub>2</sub> Cu <sub>3</sub> (ClO <sub>2</sub> ) <sub>2</sub> | 0.00 | 307 | mp-551101 | HoBi <sub>2</sub> IO <sub>4</sub>                                                | 0.00 |
| 265 | mp-23129 | Ba <sub>2</sub> Cu <sub>3</sub> (BrO <sub>2</sub> ) <sub>2</sub> | 0.00 | 308 | mp-551250 | ErBi <sub>2</sub> IO <sub>4</sub>                                                | 0.00 |
| 266 | mp-23194 | LaI <sub>2</sub>                                                 | 0.00 | 309 | mp-557018 | Cs(CoS) <sub>2</sub>                                                             | 0.00 |
| 267 | mp-24092 | GdH <sub>2</sub>                                                 | 0.00 | 310 | mp-557447 | Ba <sub>2</sub> Eu <sub>3</sub> Mn <sub>2</sub> (CuO <sub>6</sub> ) <sub>2</sub> | 0.00 |
| 268 | mp-24095 | PrH <sub>2</sub>                                                 | 0.00 | 311 | mp-562809 | GdBi <sub>2</sub> BrO <sub>4</sub>                                               | 0.00 |
| 269 | mp-24096 | NdH <sub>2</sub>                                                 | 0.00 | 312 | mp-567077 | SmB <sub>2</sub> Rh <sub>2</sub> C                                               | 0.00 |
| 270 | mp-24658 | SmH <sub>2</sub>                                                 | 0.00 | 313 | mp-567341 | PrCoC <sub>2</sub>                                                               | 0.00 |
| 271 | mp-24720 | PuH <sub>2</sub>                                                 | 0.00 | 314 | mp-568902 | Yb(CoGe) <sub>2</sub>                                                            | 0.00 |
| 272 | mp-27186 | MgVO <sub>3</sub>                                                | 0.00 | 315 | mp-568924 | PrB <sub>2</sub> Rh <sub>2</sub> C                                               | 0.00 |
| 273 | mp-27468 | U <sub>2</sub> BiN <sub>2</sub>                                  | 0.00 | 316 | mp-568940 | Y(NiP) <sub>2</sub>                                                              | 0.00 |
| 274 | mp-27496 | YUO <sub>4</sub>                                                 | 0.00 | 317 | mp-569147 | UP <sub>2</sub>                                                                  | 0.00 |
| 275 | mp-27677 | KCu <sub>4</sub> S <sub>3</sub>                                  | 0.00 | 318 | mp-569294 | NdB <sub>2</sub> Rh <sub>2</sub> C                                               | 0.00 |
| 276 | mp-27982 | PuBrO                                                            | 0.00 | 319 | mp-569408 | K(CoAs) <sub>2</sub>                                                             | 0.00 |
| 277 | mp-28614 | NaBPT <sub>3</sub>                                               | 0.00 | 320 | mp-569565 | La <sub>3</sub> (CrN <sub>3</sub> ) <sub>2</sub>                                 | 0.00 |
| 278 | mp-28753 | NdI <sub>2</sub>                                                 | 0.00 | 321 | mp-569593 | PmMg                                                                             | 0.00 |
| 279 | mp-28884 | Cs(FeAs) <sub>2</sub>                                            | 0.00 | 322 | mp-569697 | Ce(NiP) <sub>2</sub>                                                             | 0.00 |
| 280 | mp-29242 | Ba <sub>3</sub> PbO                                              | 0.00 | 323 | mp-569974 | Nd(NiP) <sub>2</sub>                                                             | 0.00 |

|     |           |                                                                                 |      |     |            |                                               |      |
|-----|-----------|---------------------------------------------------------------------------------|------|-----|------------|-----------------------------------------------|------|
| 281 | mp-29243  | Ba <sub>3</sub> SnO                                                             | 0.00 | 324 | mp-570100  | Tm(NiP) <sub>2</sub>                          | 0.00 |
| 325 | mp-570254 | ThBC                                                                            | 0.00 | 368 | mp-864943  | MnBe <sub>2</sub> Ir                          | 0.00 |
| 326 | mp-570412 | Yb(NiP) <sub>2</sub>                                                            | 0.00 | 369 | mp-864944  | MnBe <sub>2</sub> Pt                          | 0.00 |
| 327 | mp-570456 | Eu(CoAs) <sub>2</sub>                                                           | 0.00 | 370 | mp-864945  | MnBe <sub>2</sub> Rh                          | 0.00 |
| 328 | mp-570631 | U(FeP) <sub>2</sub>                                                             | 0.00 | 371 | mp-865003  | Be <sub>2</sub> IrPd                          | 0.00 |
| 329 | mp-571098 | Lu(FeSi) <sub>2</sub>                                                           | 0.00 | 372 | mp-865021  | Be <sub>2</sub> RuPt                          | 0.00 |
| 330 | mp-571342 | TiGa <sub>2</sub>                                                               | 0.00 | 373 | mp-865181  | EuGeO <sub>3</sub>                            | 0.00 |
| 331 | mp-571405 | NdTl                                                                            | 0.00 | 374 | mp-865229  | Be <sub>2</sub> NiIr                          | 0.00 |
| 332 | mp-571552 | Lu(CoGe) <sub>2</sub>                                                           | 0.00 | 375 | mp-865308  | Be <sub>2</sub> CuRh                          | 0.00 |
| 333 | mp-573563 | Sm(CoP) <sub>2</sub>                                                            | 0.00 | 376 | mp-865355  | Zn <sub>3</sub> Pt                            | 0.00 |
| 334 | mp-574199 | Sm(NiP) <sub>2</sub>                                                            | 0.00 | 377 | mp-865786  | CrPd <sub>3</sub>                             | 0.00 |
| 335 | mp-579496 | Fe <sub>3</sub> PtN                                                             | 0.00 | 378 | mp-865792  | BeSiNi <sub>2</sub>                           | 0.00 |
| 336 | mp-580234 | Fe <sub>3</sub> RhN                                                             | 0.00 | 379 | mp-865869  | Be <sub>2</sub> CuPt                          | 0.00 |
| 337 | mp-601285 | MnGaNi <sub>2</sub>                                                             | 0.00 | 380 | mp-865901  | BeCo <sub>2</sub> Si                          | 0.00 |
| 338 | mp-607111 | AlPt <sub>3</sub>                                                               | 0.00 | 381 | mp-866115  | Be <sub>2</sub> PdRh                          | 0.00 |
| 339 | mp-611623 | U(CoP) <sub>2</sub>                                                             | 0.00 | 382 | mp-866224  | Be <sub>2</sub> NiPt                          | 0.00 |
| 340 | mp-614981 | Ba <sub>2</sub> Nd(CuO <sub>2</sub> ) <sub>3</sub>                              | 0.00 | 383 | mp-866288  | BeVCo <sub>2</sub>                            | 0.00 |
| 341 | mp-639690 | PuS <sub>2</sub>                                                                | 0.00 | 384 | mp-867270  | Be <sub>2</sub> CoPt                          | 0.00 |
| 342 | mp-644246 | EuH <sub>3</sub> Pd                                                             | 0.00 | 385 | mp-867273  | Be <sub>2</sub> CuIr                          | 0.00 |
| 343 | mp-654374 | Ba <sub>2</sub> YTlCu <sub>2</sub> O <sub>7</sub>                               | 0.00 | 386 | mp-867274  | Be <sub>2</sub> CoIr                          | 0.00 |
| 344 | mp-672294 | Eu(CoSi) <sub>2</sub>                                                           | 0.00 | 387 | mp-867293  | LiCo <sub>2</sub> Si                          | 0.00 |
| 345 | mp-675626 | Cu <sub>3</sub> AsSe <sub>4</sub>                                               | 0.00 | 388 | mp-867304  | BeVFe <sub>2</sub>                            | 0.00 |
| 346 | mp-677445 | Y <sub>4</sub> SiS <sub>3</sub>                                                 | 0.00 | 389 | mp-867816  | TaRu <sub>3</sub>                             | 0.00 |
| 347 | mp-686050 | CePaO <sub>4</sub>                                                              | 0.00 | 390 | mp-867878  | AlFe <sub>2</sub> Si                          | 0.00 |
| 348 | mp-691045 | Na <sub>5</sub> Ce <sub>3</sub> Ti <sub>6</sub> Nb <sub>2</sub> O <sub>24</sub> | 0.00 | 391 | mp-867920  | K <sub>2</sub> Rh <sub>2</sub> O <sub>5</sub> | 0.00 |
| 349 | mp-753398 | WOF <sub>3</sub>                                                                | 0.00 | 392 | mp-972326  | TcPt <sub>3</sub>                             | 0.00 |
| 350 | mp-754322 | Sr <sub>2</sub> CuO <sub>4</sub>                                                | 0.00 | 393 | mp-973267  | KTcO <sub>3</sub>                             | 0.00 |
| 351 | mp-754674 | Lu(CuO <sub>2</sub> ) <sub>2</sub>                                              | 0.00 | 394 | mp-973633  | LuSi <sub>2</sub> Ni                          | 0.00 |
| 352 | mp-755713 | Tb <sub>2</sub> SbO <sub>2</sub>                                                | 0.00 | 395 | mp-973908  | PaFe <sub>3</sub>                             | 0.00 |
| 353 | mp-757102 | Sr <sub>2</sub> RhO <sub>4</sub>                                                | 0.00 | 396 | mp-974358  | Ir <sub>3</sub> Ru                            | 0.00 |
| 354 | mp-861931 | LiPt <sub>3</sub>                                                               | 0.00 | 397 | mp-974376  | PtRh <sub>3</sub>                             | 0.00 |
| 355 | mp-861936 | LiPd <sub>3</sub>                                                               | 0.00 | 398 | mp-974616  | Pt <sub>3</sub> Rh                            | 0.00 |
| 356 | mp-861939 | Ac <sub>3</sub> Sn                                                              | 0.00 | 399 | mp-976724  | Hf(VH <sub>2</sub> ) <sub>2</sub>             | 0.00 |
| 357 | mp-862377 | LiBe <sub>2</sub> Ir                                                            | 0.00 | 400 | mp-977176  | NaTcO <sub>3</sub>                            | 0.00 |
| 358 | mp-862600 | Be <sub>2</sub> PtRh                                                            | 0.00 | 401 | mp-978569  | Sm(BRh) <sub>4</sub>                          | 0.00 |
| 359 | mp-862621 | GaPt <sub>3</sub>                                                               | 0.00 | 402 | mp-989647  | YReN <sub>3</sub>                             | 0.00 |
| 360 | mp-862669 | BeFe <sub>2</sub> Si                                                            | 0.00 | 403 | mp-998212  | RbAgBr <sub>3</sub>                           | 0.00 |
| 361 | mp-862706 | BeCo <sub>2</sub> Ge                                                            | 0.00 | 404 | mp-998306  | CsPdBr <sub>3</sub>                           | 0.00 |
| 362 | mp-862910 | PmH <sub>3</sub>                                                                | 0.00 | 405 | mp-998344  | CsAgBr <sub>3</sub>                           | 0.00 |
| 363 | mp-863709 | Ir <sub>3</sub> Rh                                                              | 0.00 | 406 | mp-1001836 | MnGa                                          | 0.00 |
| 364 | mp-864606 | AcCuO <sub>3</sub>                                                              | 0.00 | 407 | mp-1006371 | CePS                                          | 0.00 |
| 365 | mp-864647 | Hf <sub>2</sub> N                                                               | 0.00 | 408 | mp-1008376 | CeH <sub>3</sub>                              | 0.00 |

|     |            |                                    |      |     |            |                                    |      |
|-----|------------|------------------------------------|------|-----|------------|------------------------------------|------|
| 366 | mp-864655  | PaCo <sub>3</sub>                  | 0.00 | 409 | mp-1014265 | Zr <sub>2</sub> N                  | 0.00 |
| 367 | mp-864895  | Be <sub>2</sub> NiRh               | 0.00 | 410 | mp-1017554 | CdNi <sub>3</sub> N                | 0.00 |
| 411 | mp-1018133 | LiHPd                              | 0.00 | 454 | mp-1079403 | Sr <sub>2</sub> CoOsO <sub>6</sub> | 0.00 |
| 412 | mp-1018658 | CaCoSi                             | 0.00 | 455 | mp-1079914 | HfSb                               | 0.00 |
| 413 | mp-1018675 | DyS <sub>2</sub>                   | 0.00 | 456 | mp-1079944 | LuCuAs <sub>2</sub>                | 0.00 |
| 414 | mp-1018709 | Hf <sub>2</sub> GaSb <sub>3</sub>  | 0.00 | 457 | mp-1080176 | Gd(BC) <sub>2</sub>                | 0.00 |
| 415 | mp-1018727 | HoS <sub>2</sub>                   | 0.00 | 458 | mp-1080399 | ThB <sub>2</sub> Rh <sub>2</sub> C | 0.00 |
| 416 | mp-1018808 | MgCoGe                             | 0.00 | 459 | mp-1080469 | HfCuGe <sub>2</sub>                | 0.00 |
| 417 | mp-1018828 | NpSeO                              | 0.00 | 460 | mp-1087483 | ThCuPO                             | 0.00 |
| 418 | mp-1019093 | PaP <sub>2</sub>                   | 0.00 | 461 | mp-1095170 | Sr <sub>2</sub> FeOsO <sub>6</sub> | 0.00 |
| 419 | mp-1025200 | Eu <sub>2</sub> TiO <sub>4</sub>   | 0.00 | 462 | mp-1095201 | ZrCuGe <sub>2</sub>                | 0.00 |
| 420 | mp-1025223 | Hf <sub>4</sub> Al <sub>3</sub>    | 0.00 | 463 | mp-1095254 | EuMoO <sub>4</sub>                 | 0.00 |
| 421 | mp-1025258 | ZnPPd <sub>5</sub>                 | 0.00 | 464 | mp-1095614 | ErAsS                              | 0.00 |
| 422 | mp-1025261 | MgPPd <sub>5</sub>                 | 0.00 | 465 | mp-1095656 | LuAsSe                             | 0.00 |
| 423 | mp-1025270 | GaPPt <sub>5</sub>                 | 0.00 | 466 | mp-1095675 | CeAsS                              | 0.00 |
| 424 | mp-1025271 | AlPPt <sub>5</sub>                 | 0.00 | 467 | mp-1101828 | TbAsS                              | 0.00 |
| 425 | mp-1025272 | ZnPPt <sub>5</sub>                 | 0.00 | 468 | mp-1101897 | GdAsS                              | 0.00 |
| 426 | mp-1025301 | GaPPd <sub>5</sub>                 | 0.00 | 469 | mp-1102052 | DyAsS                              | 0.00 |
| 427 | mp-1025393 | TmSi <sub>2</sub> Ni               | 0.00 | 470 | mp-1102079 | TmAsS                              | 0.00 |
| 428 | mp-1025519 | RbCu <sub>4</sub> S <sub>3</sub>   | 0.00 | 471 | mp-1102733 | HoAsS                              | 0.00 |
| 429 | mp-1058490 | EuIn                               | 0.00 | 472 | mp-1102959 | YAsS                               | 0.00 |
| 430 | mp-1063174 | GdAu <sub>2</sub>                  | 0.00 | 473 | mp-1103398 | TmAsSe                             | 0.00 |
| 431 | mp-1067935 | Ho <sub>2</sub> SbO <sub>2</sub>   | 0.00 | 474 | mp-1103625 | Np <sub>2</sub> Se <sub>5</sub>    | 0.00 |
| 432 | mp-1067937 | Ho <sub>2</sub> BiO <sub>2</sub>   | 0.00 | 475 | mp-1103808 | La <sub>4</sub> H <sub>9</sub>     | 0.00 |
| 433 | mp-1068300 | Ca(FeAs) <sub>2</sub>              | 0.00 | 476 | mp-1104116 | La <sub>2</sub> H <sub>5</sub>     | 0.00 |
| 434 | mp-1068786 | InCo <sub>3</sub> N                | 0.00 | 477 | mp-1104579 | Ce <sub>2</sub> H <sub>5</sub>     | 0.00 |
| 435 | mp-1068954 | Tb <sub>2</sub> BiO <sub>2</sub>   | 0.00 | 478 | mp-1105218 | NaOsO <sub>3</sub>                 | 0.00 |
| 436 | mp-1069057 | Sr(CoSi) <sub>2</sub>              | 0.00 | 479 | mp-1106241 | BaTbMn <sub>2</sub> O <sub>5</sub> | 0.00 |
| 437 | mp-1069288 | MnGa <sub>4</sub>                  | 0.00 | 480 | mp-1147653 | CaCu <sub>3</sub> O <sub>4</sub>   | 0.00 |
| 438 | mp-1069561 | Dy <sub>2</sub> BiO <sub>2</sub>   | 0.00 | 481 | mp-1178355 | Er <sub>2</sub> TeO <sub>2</sub>   | 0.00 |
| 439 | mp-1069613 | Er <sub>2</sub> BiO <sub>2</sub>   | 0.00 | 482 | mp-1178366 | Dy <sub>2</sub> SbO <sub>2</sub>   | 0.00 |
| 440 | mp-1070152 | Ca(CoSi) <sub>2</sub>              | 0.00 | 483 | mp-1178924 | Tm(BIr) <sub>4</sub>               | 0.00 |
| 441 | mp-1070510 | Y <sub>2</sub> BiO <sub>2</sub>    | 0.00 | 484 | mp-1183139 | AcNiO <sub>3</sub>                 | 0.00 |
| 442 | mp-1070662 | Gd <sub>2</sub> BiO <sub>2</sub>   | 0.00 | 485 | mp-1183419 | Be <sub>2</sub> IrRu               | 0.00 |
| 443 | mp-1070713 | InNi <sub>3</sub> N                | 0.00 | 486 | mp-1183998 | Ga <sub>3</sub> Tc                 | 0.00 |
| 444 | mp-1077133 | GdCoSi                             | 0.00 | 487 | mp-1184119 | CuPd <sub>3</sub>                  | 0.00 |
| 445 | mp-1077201 | UAsP                               | 0.00 | 488 | mp-1184336 | FeIr <sub>3</sub>                  | 0.00 |
| 446 | mp-1077374 | ThSiS                              | 0.00 | 489 | mp-1185317 | LiBe <sub>2</sub> Pt               | 0.00 |
| 447 | mp-1077453 | HfCuGe                             | 0.00 | 490 | mp-1185616 | Mn <sub>2</sub> CrSi               | 0.00 |
| 448 | mp-1077918 | Sr <sub>2</sub> TcO <sub>4</sub>   | 0.00 | 491 | mp-1186117 | NiPt <sub>3</sub>                  | 0.00 |
| 449 | mp-1078278 | CrB <sub>4</sub>                   | 0.00 | 492 | mp-1186350 | NiIr <sub>3</sub>                  | 0.00 |
| 450 | mp-1078518 | Sr <sub>2</sub> NiIrO <sub>6</sub> | 0.00 | 493 | mp-1186437 | Pd <sub>3</sub> W                  | 0.00 |
| 451 | mp-1078866 | Y(BC) <sub>2</sub>                 | 0.00 | 494 | mp-1186902 | Re <sub>3</sub> Ir                 | 0.00 |

|     |            |                                                                 |      |     |            |                                                                     |      |
|-----|------------|-----------------------------------------------------------------|------|-----|------------|---------------------------------------------------------------------|------|
| 452 | mp-1078868 | Sr <sub>2</sub> MgReO <sub>6</sub>                              | 0.00 | 495 | mp-1187243 | TaOs <sub>3</sub>                                                   | 0.00 |
| 453 | mp-1079111 | EuTiO <sub>3</sub>                                              | 0.00 | 496 | mp-1188853 | CaTcO <sub>3</sub>                                                  | 0.00 |
| 497 | mp-1189046 | Er(BIr) <sub>4</sub>                                            | 0.00 | 540 | mp-1218352 | Sr <sub>3</sub> NdMn <sub>2</sub> O <sub>8</sub>                    | 0.00 |
| 498 | mp-1189906 | Ca <sub>2</sub> CrSbO <sub>6</sub>                              | 0.00 | 541 | mp-1218450 | Sr <sub>3</sub> La(NiO <sub>4</sub> ) <sub>2</sub>                  | 0.00 |
| 499 | mp-1190025 | Ba <sub>2</sub> US <sub>6</sub>                                 | 0.00 | 542 | mp-1218451 | Sr <sub>3</sub> PrMn <sub>2</sub> O <sub>8</sub>                    | 0.00 |
| 500 | mp-1206312 | SmCr <sub>2</sub> Si <sub>2</sub> C                             | 0.00 | 543 | mp-1218464 | Sr <sub>4</sub> TlFe <sub>2</sub> O <sub>9</sub>                    | 0.00 |
| 501 | mp-1206409 | K(FeP) <sub>2</sub>                                             | 0.00 | 544 | mp-1218503 | Sr <sub>8</sub> RuRh <sub>3</sub> O <sub>16</sub>                   | 0.00 |
| 502 | mp-1206423 | NdIn                                                            | 0.00 | 545 | mp-1218716 | Sr <sub>2</sub> Pr <sub>2</sub> TlNi <sub>2</sub> O <sub>9</sub>    | 0.00 |
| 503 | mp-1206645 | Sr <sub>2</sub> TiMnO <sub>6</sub>                              | 0.00 | 546 | mp-1218769 | Sr <sub>2</sub> MnRuO <sub>6</sub>                                  | 0.00 |
| 504 | mp-1206780 | Ti <sub>2</sub> Sb                                              | 0.00 | 547 | mp-1218828 | Sr <sub>2</sub> FeO <sub>3</sub> F                                  | 0.00 |
| 505 | mp-1206830 | Cs(CoAs) <sub>2</sub>                                           | 0.00 | 548 | mp-1218849 | Sr <sub>2</sub> GdCu <sub>2</sub> IrO <sub>8</sub>                  | 0.00 |
| 506 | mp-1207007 | Tm(MnSi) <sub>2</sub>                                           | 0.00 | 549 | mp-1219180 | Sm <sub>2</sub> SbO <sub>2</sub>                                    | 0.00 |
| 507 | mp-1207079 | SrH <sub>3</sub> Pd                                             | 0.00 | 550 | mp-1219319 | Sm <sub>2</sub> CoNiO <sub>6</sub>                                  | 0.00 |
| 508 | mp-1207092 | GdHSe                                                           | 0.00 | 551 | mp-1219665 | PuPaO <sub>4</sub>                                                  | 0.00 |
| 509 | mp-1207112 | Lu(MnSi) <sub>2</sub>                                           | 0.00 | 552 | mp-1219797 | Ni <sub>6</sub> SnTe <sub>2</sub>                                   | 0.00 |
| 510 | mp-1207117 | Fe <sub>2</sub> CoSi                                            | 0.00 | 553 | mp-1219894 | Pr <sub>2</sub> InAg                                                | 0.00 |
| 511 | mp-1207125 | Cs(FeP) <sub>2</sub>                                            | 0.00 | 554 | mp-1220715 | Nb <sub>3</sub> Fe(BiO <sub>3</sub> ) <sub>6</sub>                  | 0.00 |
| 512 | mp-1207142 | Rb(CoAs) <sub>2</sub>                                           | 0.00 | 555 | mp-1221696 | MnFePd <sub>6</sub>                                                 | 0.00 |
| 513 | mp-1207868 | UAgF <sub>6</sub>                                               | 0.00 | 556 | mp-1222266 | Lu <sub>3</sub> S <sub>4</sub>                                      | 0.00 |
| 514 | mp-1209751 | Pr <sub>2</sub> MnNiO <sub>6</sub>                              | 0.00 | 557 | mp-1222329 | LuAlCu                                                              | 0.00 |
| 515 | mp-1209940 | NaSmCu <sub>2</sub> F <sub>8</sub>                              | 0.00 | 558 | mp-1224337 | HfScGe <sub>4</sub>                                                 | 0.00 |
| 516 | mp-1209951 | NaYbCu <sub>2</sub> F <sub>8</sub>                              | 0.00 | 559 | mp-1224680 | Gd <sub>2</sub> SbO <sub>2</sub>                                    | 0.00 |
| 517 | mp-1210068 | NaErCu <sub>2</sub> F <sub>8</sub>                              | 0.00 | 560 | mp-1224823 | GaGePt <sub>6</sub>                                                 | 0.00 |
| 518 | mp-1210079 | NaGdCu <sub>2</sub> F <sub>8</sub>                              | 0.00 | 561 | mp-1224947 | FeNiPt <sub>6</sub>                                                 | 0.00 |
| 519 | mp-1210114 | NaEu(MoO <sub>4</sub> ) <sub>2</sub>                            | 0.00 | 562 | mp-1225447 | ErPaO <sub>4</sub>                                                  | 0.00 |
| 520 | mp-1210555 | Mn <sub>3</sub> SnH                                             | 0.00 | 563 | mp-1225518 | Er <sub>2</sub> SbO <sub>2</sub>                                    | 0.00 |
| 521 | mp-1213889 | Ce <sub>3</sub> Cu <sub>4</sub> (P <sub>2</sub> O) <sub>2</sub> | 0.00 | 564 | mp-1225693 | DyMn <sub>2</sub> SiGe                                              | 0.00 |
| 522 | mp-1214103 | Ca <sub>2</sub> TaCrO <sub>6</sub>                              | 0.00 | 565 | mp-1226070 | CoCuS <sub>4</sub>                                                  | 0.00 |
| 523 | mp-1214115 | Ca <sub>2</sub> NbCrO <sub>6</sub>                              | 0.00 | 566 | mp-1226551 | CePtRh                                                              | 0.00 |
| 524 | mp-1214577 | Ba <sub>2</sub> Sm(CuO <sub>2</sub> ) <sub>4</sub>              | 0.00 | 567 | mp-1226589 | CeNdAl <sub>2</sub> O <sub>6</sub>                                  | 0.00 |
| 525 | mp-1214585 | Ba <sub>2</sub> Pr(CuO <sub>2</sub> ) <sub>3</sub>              | 0.00 | 568 | mp-1226653 | CePt <sub>2</sub> Au <sub>3</sub>                                   | 0.00 |
| 526 | mp-1214720 | Ba <sub>2</sub> Gd(CuO <sub>2</sub> ) <sub>4</sub>              | 0.00 | 569 | mp-1226848 | Ce <sub>4</sub> Cu <sub>3</sub> (SO) <sub>4</sub>                   | 0.00 |
| 527 | mp-1215169 | ZrVW                                                            | 0.00 | 570 | mp-1226890 | Ce <sub>4</sub> H <sub>11</sub>                                     | 0.00 |
| 528 | mp-1215378 | Zr <sub>4</sub> Ni <sub>3</sub> As <sub>8</sub>                 | 0.00 | 571 | mp-1227161 | CaPr <sub>3</sub> (FeO <sub>3</sub> ) <sub>4</sub>                  | 0.00 |
| 529 | mp-1215463 | YbPaO <sub>4</sub>                                              | 0.00 | 572 | mp-1227251 | CaMnFeGe <sub>2</sub>                                               | 0.00 |
| 530 | mp-1216092 | YMn <sub>2</sub> SiGe                                           | 0.00 | 573 | mp-1227487 | Ca <sub>2</sub> MgReO <sub>6</sub>                                  | 0.00 |
| 531 | mp-1216599 | UCuSi <sub>2</sub> Ni                                           | 0.00 | 574 | mp-1227620 | Ca <sub>3</sub> YTi <sub>4</sub> O <sub>12</sub>                    | 0.00 |
| 532 | mp-1216793 | UNiP <sub>2</sub>                                               | 0.00 | 575 | mp-1227698 | Ca <sub>2</sub> TlIn                                                | 0.00 |
| 533 | mp-1217891 | TaTiAl <sub>6</sub>                                             | 0.00 | 576 | mp-1228257 | Ba <sub>2</sub> YCu <sub>3</sub> PbO <sub>7</sub>                   | 0.00 |
| 534 | mp-1217893 | TaNbAl <sub>6</sub>                                             | 0.00 | 577 | mp-1228402 | Ba <sub>2</sub> NdTlCu <sub>2</sub> O <sub>7</sub>                  | 0.00 |
| 535 | mp-1217981 | SrNdNiO <sub>4</sub>                                            | 0.00 | 578 | mp-1229131 | Ba <sub>10</sub> Pr <sub>4</sub> Y(CuO <sub>2</sub> ) <sub>20</sub> | 0.00 |
| 536 | mp-1218069 | SrPr(FeO <sub>3</sub> ) <sub>2</sub>                            | 0.00 | 579 | mp-1274387 | La <sub>2</sub> ZnCoO <sub>6</sub>                                  | 0.00 |
| 537 | mp-1218104 | SrPr <sub>3</sub> (FeO <sub>3</sub> ) <sub>4</sub>              | 0.00 | 580 | mvc-10314  | CaHo(FeO <sub>3</sub> ) <sub>2</sub>                                | 0.00 |

|     |            |                                                      |      |     |            |                                                               |      |
|-----|------------|------------------------------------------------------|------|-----|------------|---------------------------------------------------------------|------|
| 538 | mp-1218155 | SrLaNiO <sub>4</sub>                                 | 0.00 | 581 | mvc-5785   | Ca <sub>2</sub> CrIrO <sub>6</sub>                            | 0.00 |
| 539 | mp-1218189 | SrLaCrO <sub>4</sub>                                 | 0.00 | 582 | mvc-9241   | CaPrTi <sub>2</sub> O <sub>6</sub>                            | 0.00 |
| 583 | mp-22619   | NiP <sub>2</sub>                                     | 0.01 | 626 | mp-4405    | Rb <sub>3</sub> AuO                                           | 1.09 |
| 584 | mp-1078180 | Sr <sub>2</sub> MgOsO <sub>6</sub>                   | 0.02 | 627 | mp-22736   | InCuS <sub>2</sub>                                            | 1.10 |
| 585 | mp-1106184 | MnB <sub>4</sub>                                     | 0.07 | 628 | mp-10289   | Ca(BC) <sub>2</sub>                                           | 1.10 |
| 586 | mp-1101764 | NdAsS                                                | 0.08 | 629 | mp-35152   | Sr <sub>2</sub> H <sub>5</sub> Rh                             | 1.13 |
| 587 | mp-1212091 | HoAsSe                                               | 0.10 | 630 | mp-1079541 | ZnCu <sub>2</sub> SnS <sub>4</sub>                            | 1.15 |
| 588 | mp-1102952 | DyAsSe                                               | 0.10 | 631 | mp-29754   | SrLiN                                                         | 1.15 |
| 589 | mp-1102476 | TbAsSe                                               | 0.10 | 632 | mp-676409  | EuPaO <sub>4</sub>                                            | 1.19 |
| 590 | mp-1095603 | YAsSe                                                | 0.10 | 633 | mp-149     | Si                                                            | 1.20 |
| 591 | mp-1213048 | ErAsSe                                               | 0.10 | 634 | mp-1101971 | FePS                                                          | 1.22 |
| 592 | mp-22020   | Ca <sub>2</sub> NiOsO <sub>6</sub>                   | 0.11 | 635 | mp-9774    | Ba <sub>4</sub> Sb <sub>2</sub> O                             | 1.24 |
| 593 | mp-1102762 | SmAsS                                                | 0.13 | 636 | mp-1079889 | ZnAg <sub>2</sub> SnS <sub>4</sub>                            | 1.24 |
| 594 | mp-505569  | CeH <sub>2</sub>                                     | 0.16 | 637 | mp-1013550 | Ca <sub>3</sub> SbP                                           | 1.24 |
| 595 | mp-1189762 | EuCrO <sub>3</sub>                                   | 0.23 | 638 | mp-1009088 | BeGeAs <sub>2</sub>                                           | 1.25 |
| 596 | mp-1018144 | LaH <sub>3</sub>                                     | 0.26 | 639 | mp-773137  | KCaBi                                                         | 1.31 |
| 597 | mp-19115   | CaFeO <sub>3</sub>                                   | 0.26 | 640 | mp-27763   | UIN                                                           | 1.35 |
| 598 | mp-5702    | Cu <sub>3</sub> SbS <sub>4</sub>                     | 0.29 | 641 | mp-1575878 | Ca <sub>3</sub> Fe <sub>2</sub> O <sub>7</sub>                | 1.38 |
| 599 | mp-1078624 | LaCoC <sub>2</sub>                                   | 0.29 | 642 | mp-680339  | Mn <sub>4</sub> Si <sub>7</sub>                               | 1.40 |
| 600 | mp-1183416 | BeCrFe <sub>2</sub>                                  | 0.30 | 643 | mp-7623    | MgAs <sub>4</sub>                                             | 1.40 |
| 601 | mp-866152  | TiBeCo <sub>2</sub>                                  | 0.36 | 644 | mp-27762   | UBrN                                                          | 1.42 |
| 602 | mp-1225890 | Cu <sub>9</sub> Sb(AsS <sub>6</sub> ) <sub>2</sub>   | 0.38 | 645 | mp-542187  | Sr <sub>2</sub> MnClO <sub>3</sub>                            | 1.43 |
| 603 | mp-18940   | Sr <sub>2</sub> NiMoO <sub>6</sub>                   | 0.43 | 646 | mp-6408    | ZnCu <sub>2</sub> GeS <sub>4</sub>                            | 1.49 |
| 604 | mp-1205944 | Sr <sub>2</sub> TaVO <sub>6</sub>                    | 0.44 | 647 | mp-1216153 | Y <sub>2</sub> CrFeO <sub>6</sub>                             | 1.49 |
| 605 | mp-1191365 | GdPS                                                 | 0.47 | 648 | mp-1232352 | Dy <sub>2</sub> CrFeO <sub>6</sub>                            | 1.49 |
| 606 | mp-1013558 | Ca <sub>3</sub> BiP                                  | 0.53 | 649 | mp-2199    | Fe <sub>3</sub> Si                                            | 1.50 |
| 607 | mp-569001  | Sr <sub>2</sub> LiCoN <sub>2</sub>                   | 0.56 | 650 | mp-9200    | K <sub>3</sub> AuO                                            | 1.51 |
| 608 | mp-1025467 | Cu <sub>2</sub> SnHgS <sub>4</sub>                   | 0.61 | 651 | mp-27891   | Bi <sub>2</sub> SO <sub>2</sub>                               | 1.52 |
| 609 | mp-18820   | Sr <sub>3</sub> Fe <sub>2</sub> O <sub>7</sub>       | 0.65 | 652 | mp-1218763 | Sr <sub>2</sub> MnSbO <sub>6</sub>                            | 1.57 |
| 610 | mp-14285   | CoP <sub>2</sub>                                     | 0.72 | 653 | mp-9306    | Sr <sub>3</sub> ZnN <sub>2</sub>                              | 1.58 |
| 611 | mp-1190998 | PrPS                                                 | 0.75 | 654 | mp-1221609 | MnGa(CuSe <sub>2</sub> ) <sub>2</sub>                         | 1.60 |
| 612 | mp-1191667 | NdPS                                                 | 0.80 | 655 | mp-13682   | PdS <sub>2</sub>                                              | 1.63 |
| 613 | mp-1219942 | Sr <sub>2</sub> YCu <sub>2</sub> BiPbO <sub>8</sub>  | 0.80 | 656 | mp-1178173 | Ho <sub>2</sub> TeO <sub>2</sub>                              | 1.63 |
| 614 | mp-1192185 | DyPS                                                 | 0.80 | 657 | mp-19443   | WO <sub>3</sub>                                               | 1.65 |
| 615 | mp-1191026 | YPS                                                  | 0.88 | 658 | mp-555874  | LiAsS <sub>2</sub>                                            | 1.65 |
| 616 | mp-1191565 | SmPS                                                 | 0.88 | 659 | mp-1224851 | GaCuGeSe <sub>4</sub>                                         | 1.67 |
| 617 | mp-2097    | SnO                                                  | 0.88 | 660 | mp-755756  | Y <sub>2</sub> TeO <sub>2</sub>                               | 1.70 |
| 618 | mp-1225836 | Cu <sub>4</sub> Bi <sub>3</sub> Pb(SeO) <sub>4</sub> | 0.89 | 661 | mp-1009087 | BeSiAs <sub>2</sub>                                           | 1.72 |
| 619 | mp-1190952 | TbPS                                                 | 0.90 | 662 | mp-16037   | Dy <sub>2</sub> TeO <sub>2</sub>                              | 1.73 |
| 620 | mp-1078292 | CdCu <sub>2</sub> SnS <sub>4</sub>                   | 0.96 | 663 | mp-1232332 | ZnCu <sub>2</sub> SiSe <sub>4</sub>                           | 1.75 |
| 621 | mp-10952   | Cu <sub>2</sub> HgGeS <sub>4</sub>                   | 0.96 | 664 | mp-10960   | Tb <sub>2</sub> Ti <sub>2</sub> S <sub>2</sub> O <sub>5</sub> | 1.77 |
| 622 | mp-552098  | Bi <sub>2</sub> SeO <sub>2</sub>                     | 1.00 | 665 | mp-1245502 | Li <sub>2</sub> TiN <sub>2</sub>                              | 1.82 |
| 623 | mp-23116   | CuBiSeO                                              | 1.05 | 666 | mp-16036   | Tb <sub>2</sub> TeO <sub>2</sub>                              | 1.82 |



|     |            |                                                               |      |     |            |                                                                   |      |
|-----|------------|---------------------------------------------------------------|------|-----|------------|-------------------------------------------------------------------|------|
| 624 | mp-1228030 | Ba <sub>4</sub> Bi <sub>2</sub> O                             | 1.08 | 667 | mp-15845   | SrLi <sub>4</sub> N <sub>2</sub>                                  | 1.83 |
| 625 | mp-865213  | Ba <sub>8</sub> Bi <sub>4</sub> H <sub>2</sub> O              | 1.09 | 668 | mp-25305   | Y <sub>2</sub> Ti <sub>2</sub> S <sub>2</sub> O <sub>5</sub>      | 1.85 |
| 669 | mp-5999    | Sm <sub>2</sub> Ti <sub>2</sub> S <sub>2</sub> O <sub>5</sub> | 1.85 | 712 | mp-1226996 | CdBi <sub>12</sub> (Cl <sub>7</sub> O <sub>6</sub> ) <sub>2</sub> | 2.36 |
| 670 | mp-20794   | Sr <sub>2</sub> NiWO <sub>6</sub>                             | 1.86 | 713 | mp-552008  | DyBi <sub>2</sub> ClO <sub>4</sub>                                | 2.36 |
| 671 | mp-9517    | SrTiN <sub>2</sub>                                            | 1.90 | 714 | mp-9158    | LiCuO <sub>2</sub>                                                | 2.37 |
| 672 | mp-552028  | Nd <sub>2</sub> Ti <sub>2</sub> S <sub>2</sub> O <sub>5</sub> | 1.90 | 715 | mp-549127  | HoBi <sub>2</sub> ClO <sub>4</sub>                                | 2.38 |
| 673 | mp-552963  | Pr <sub>2</sub> Ti <sub>2</sub> S <sub>2</sub> O <sub>5</sub> | 1.90 | 716 | mp-29091   | Ti(CuS) <sub>4</sub>                                              | 2.38 |
| 674 | mp-4524    | ZnGeP <sub>2</sub>                                            | 1.96 | 717 | mp-768368  | K <sub>4</sub> I <sub>2</sub> O                                   | 2.39 |
| 675 | mp-5238    | GaCuS <sub>2</sub>                                            | 1.96 | 718 | mp-549709  | ErBi <sub>2</sub> ClO <sub>4</sub>                                | 2.39 |
| 676 | mp-1226003 | CoPS                                                          | 1.98 | 719 | mp-546082  | TmBi <sub>2</sub> ClO <sub>4</sub>                                | 2.40 |
| 677 | mp-3762    | VCu <sub>3</sub> S <sub>4</sub>                               | 2.02 | 720 | mp-22922   | AgCl                                                              | 2.43 |
| 678 | mp-1025340 | Cu <sub>2</sub> WSe <sub>4</sub>                              | 2.03 | 721 | mp-23480   | Bi <sub>2</sub> WO <sub>6</sub>                                   | 2.43 |
| 679 | mp-556560  | MnF <sub>3</sub>                                              | 2.03 | 722 | mp-23630   | NbBi <sub>4</sub> ClO <sub>8</sub>                                | 2.46 |
| 680 | mp-5760    | NdSF                                                          | 2.04 | 723 | mp-1271282 | CoF <sub>3</sub>                                                  | 2.46 |
| 681 | mp-4763    | ZnSiP <sub>2</sub>                                            | 2.05 | 724 | mp-551244  | CsK <sub>2</sub> CoO <sub>2</sub>                                 | 2.47 |
| 682 | mp-3931    | SmSF                                                          | 2.07 | 725 | mp-1274783 | SrLaCoO <sub>4</sub>                                              | 2.49 |
| 683 | mp-1522    | FeS <sub>2</sub>                                              | 2.10 | 726 | mp-1296711 | LaCoO <sub>3</sub>                                                | 2.52 |
| 684 | mp-10930   | TbSF                                                          | 2.10 | 727 | mp-753353  | Sr <sub>4</sub> LiCu(CO <sub>5</sub> ) <sub>2</sub>               | 2.54 |
| 685 | mp-552857  | TbBi <sub>2</sub> IO <sub>4</sub>                             | 2.12 | 728 | mp-23602   | TaBi <sub>4</sub> ClO <sub>8</sub>                                | 2.57 |
| 686 | mp-9846    | RbCaSb                                                        | 2.12 | 729 | mp-706     | HgF                                                               | 2.59 |
| 687 | mp-29782   | Bi <sub>2</sub> W <sub>2</sub> O <sub>9</sub>                 | 2.13 | 730 | mp-1211474 | K <sub>2</sub> Ti(CuS <sub>2</sub> ) <sub>2</sub>                 | 2.61 |
| 688 | mp-546266  | DyBi <sub>2</sub> IO <sub>4</sub>                             | 2.15 | 731 | mp-5621    | NbCu <sub>3</sub> S <sub>4</sub>                                  | 2.61 |
| 689 | mp-913     | CdP <sub>2</sub>                                              | 2.16 | 732 | mp-7129    | Rb <sub>2</sub> Ti(CuS <sub>2</sub> ) <sub>2</sub>                | 2.63 |
| 690 | mp-28171   | K <sub>3</sub> IO                                             | 2.18 | 733 | mp-20090   | PrCoO <sub>3</sub>                                                | 2.66 |
| 691 | mp-551816  | YBi <sub>2</sub> IO <sub>4</sub>                              | 2.18 | 734 | mp-554207  | TaBi <sub>4</sub> BrO <sub>8</sub>                                | 2.70 |
| 692 | mp-10086   | YSF                                                           | 2.18 | 735 | mp-22599   | NdCoO <sub>3</sub>                                                | 2.72 |
| 693 | mp-1105187 | CuPS <sub>3</sub>                                             | 2.20 | 736 | mp-5339    | CsNaTe                                                            | 2.73 |
| 694 | mp-1541943 | Zn(CuO <sub>2</sub> ) <sub>2</sub>                            | 2.21 | 737 | mp-1212757 | EuCoO <sub>3</sub>                                                | 2.87 |
| 695 | mp-552738  | TmBi <sub>2</sub> IO <sub>4</sub>                             | 2.22 | 738 | mp-553310  | CsCuO <sub>2</sub>                                                | 2.89 |
| 696 | mp-550635  | LuBi <sub>2</sub> IO <sub>4</sub>                             | 2.22 | 739 | mp-10748   | TaCu <sub>3</sub> S <sub>4</sub>                                  | 2.94 |
| 697 | mp-549475  | TbBi <sub>2</sub> BrO <sub>4</sub>                            | 2.22 | 740 | mp-7206    | TcAgO <sub>4</sub>                                                | 2.99 |
| 698 | mp-552992  | DyBi <sub>2</sub> BrO <sub>4</sub>                            | 2.24 | 741 | mp-11919   | Sr(BeN) <sub>2</sub>                                              | 3.00 |
| 699 | mp-1223929 | InCuGeS <sub>4</sub>                                          | 2.25 | 742 | mp-1080625 | Sr <sub>2</sub> LiReO <sub>6</sub>                                | 3.03 |
| 700 | mp-553243  | YBi <sub>2</sub> BrO <sub>4</sub>                             | 2.26 | 743 | mp-20652   | PbF <sub>3</sub>                                                  | 3.05 |
| 701 | mp-546152  | SmBi <sub>2</sub> ClO <sub>4</sub>                            | 2.26 | 744 | mp-947     | Au <sub>2</sub> S                                                 | 3.05 |
| 702 | mp-546621  | ErBi <sub>2</sub> BrO <sub>4</sub>                            | 2.28 | 745 | mp-4979    | AlCuS <sub>2</sub>                                                | 3.07 |
| 703 | mp-19208   | La <sub>2</sub> MnCoO <sub>6</sub>                            | 2.28 | 746 | mp-20459   | TiPbO <sub>3</sub>                                                | 3.07 |
| 704 | mp-546625  | HoBi <sub>2</sub> BrO <sub>4</sub>                            | 2.29 | 747 | mp-7907    | Al <sub>2</sub> ZnSe <sub>4</sub>                                 | 3.14 |
| 705 | mp-546350  | TmBi <sub>2</sub> BrO <sub>4</sub>                            | 2.31 | 748 | mp-23064   | Bi <sub>2</sub> MoO <sub>6</sub>                                  | 3.21 |
| 706 | mp-2490    | GaP                                                           | 2.32 | 749 | mp-23072   | BiBrO                                                             | 3.21 |
| 707 | mp-27251   | Bi <sub>2</sub> TeO <sub>6</sub>                              | 2.33 | 750 | mp-20727   | Sb <sub>2</sub> PbO <sub>6</sub>                                  | 3.23 |
| 708 | mp-1550    | AlP                                                           | 2.33 | 751 | mp-13900   | Sr(CuO) <sub>2</sub>                                              | 3.24 |
| 709 | mp-547125  | TbBi <sub>2</sub> ClO <sub>4</sub>                            | 2.34 | 752 | mp-2352    | Na <sub>2</sub> O                                                 | 3.27 |

|     |            |                                                                                  |      |     |            |                                                  |      |
|-----|------------|----------------------------------------------------------------------------------|------|-----|------------|--------------------------------------------------|------|
| 710 | mp-1189897 | Ba <sub>2</sub> ThS <sub>6</sub>                                                 | 2.35 | 753 | mp-4651    | SrTiO <sub>3</sub>                               | 3.27 |
| 711 | mp-552604  | YBi <sub>2</sub> ClO <sub>4</sub>                                                | 2.35 | 754 | mp-3349    | Sr <sub>3</sub> Ti <sub>2</sub> O <sub>7</sub>   | 3.28 |
| 755 | mp-1207386 | ZrNF                                                                             | 3.29 | 798 | mp-1216536 | TmPaO <sub>4</sub>                               | 4.17 |
| 756 | mp-40830   | NaSr <sub>3</sub> LaTi <sub>5</sub> O <sub>15</sub>                              | 3.32 | 799 | mp-973585  | LuIO                                             | 4.17 |
| 757 | mp-5532    | Sr <sub>2</sub> TiO <sub>4</sub>                                                 | 3.35 | 800 | mp-1222263 | LuPaO <sub>4</sub>                               | 4.22 |
| 758 | mp-5350    | Zn(GaS <sub>2</sub> ) <sub>2</sub>                                               | 3.39 | 801 | mp-1194523 | Li <sub>2</sub> CaTa <sub>2</sub> O <sub>7</sub> | 4.23 |
| 759 | mp-1342    | BaO                                                                              | 3.40 | 802 | mp-27439   | TmIO                                             | 4.34 |
| 760 | mp-558917  | LiMoIO <sub>6</sub>                                                              | 3.43 | 803 | mp-19426   | CaWO <sub>4</sub>                                | 4.37 |
| 761 | mp-20194   | CeO <sub>2</sub>                                                                 | 3.45 | 804 | mp-1443    | Sn <sub>3</sub> F <sub>8</sub>                   | 4.37 |
| 762 | mp-694961  | Na <sub>9</sub> Sr <sub>2</sub> Nd <sub>9</sub> Ti <sub>20</sub> O <sub>60</sub> | 3.45 | 805 | mp-28020   | AlCuCl <sub>4</sub>                              | 4.40 |
| 763 | mp-643260  | Na <sub>2</sub> H <sub>4</sub> Pd                                                | 3.47 | 806 | mp-753173  | HoIO                                             | 4.41 |
| 764 | mp-1220820 | NaBi <sub>3</sub> (ClO <sub>2</sub> ) <sub>2</sub>                               | 3.48 | 807 | mp-555560  | CdTeMoO <sub>6</sub>                             | 4.42 |
| 765 | mp-560114  | Er <sub>3</sub> O <sub>2</sub> F <sub>5</sub>                                    | 3.51 | 808 | mp-2964    | NaNO <sub>2</sub>                                | 4.42 |
| 766 | mp-1539317 | Ta <sub>2</sub> O <sub>5</sub>                                                   | 3.51 | 809 | mp-9126    | Sr(SbO <sub>3</sub> ) <sub>2</sub>               | 4.43 |
| 767 | mp-1210016 | NaNdMgWO <sub>6</sub>                                                            | 3.51 | 810 | mp-1173356 | PrPaO <sub>4</sub>                               | 4.44 |
| 768 | mp-22939   | BiClO                                                                            | 3.55 | 811 | mp-1173377 | NdPaO <sub>4</sub>                               | 4.45 |
| 769 | mp-556210  | Bi <sub>2</sub> CO <sub>5</sub>                                                  | 3.57 | 812 | mp-1173352 | PmPaO <sub>4</sub>                               | 4.46 |
| 770 | mp-1539136 | CaCu <sub>2</sub> F <sub>8</sub>                                                 | 3.60 | 813 | mp-753712  | YIO                                              | 4.46 |
| 771 | mp-29362   | GaCuCl <sub>4</sub>                                                              | 3.61 | 814 | mp-23730   | NaMgH <sub>3</sub>                               | 4.47 |
| 772 | mp-11918   | Ca(BeN) <sub>2</sub>                                                             | 3.69 | 815 | mp-1173297 | SmPaO <sub>4</sub>                               | 4.47 |
| 773 | mp-1221380 | Na <sub>3</sub> EuTi <sub>2</sub> Nb <sub>2</sub> O <sub>12</sub>                | 3.70 | 816 | mp-3338    | NaGaO <sub>2</sub>                               | 4.47 |
| 774 | mp-1210188 | Nd <sub>2</sub> Ti <sub>3</sub> (BiO <sub>6</sub> ) <sub>2</sub>                 | 3.70 | 817 | mp-1173104 | TbPaO <sub>4</sub>                               | 4.49 |
| 775 | mp-1210092 | NaBi(MoO <sub>4</sub> ) <sub>2</sub>                                             | 3.70 | 818 | mp-1103472 | Na <sub>2</sub> UF <sub>8</sub>                  | 4.51 |
| 776 | mp-23089   | SrTa <sub>2</sub> Bi <sub>2</sub> O <sub>9</sub>                                 | 3.70 | 819 | mp-1100867 | YPaO <sub>4</sub>                                | 4.54 |
| 777 | mp-7094    | ReAgO <sub>4</sub>                                                               | 3.72 | 820 | mp-23360   | Zn(IO <sub>3</sub> ) <sub>2</sub>                | 4.60 |
| 778 | mp-1173345 | PaInO <sub>4</sub>                                                               | 3.73 | 821 | mp-557724  | KBiF <sub>6</sub>                                | 4.64 |
| 779 | mp-1221219 | Na <sub>3</sub> SrTa <sub>4</sub> O <sub>12</sub>                                | 3.75 | 822 | mp-19163   | SrWO <sub>4</sub>                                | 4.66 |
| 780 | mp-1221182 | NaCa <sub>2</sub> Nb <sub>8</sub> (BiO <sub>4</sub> ) <sub>9</sub>               | 3.75 | 823 | mp-1220980 | NaNd(MoO <sub>4</sub> ) <sub>2</sub>             | 4.72 |
| 781 | mp-4019    | CaTiO <sub>3</sub>                                                               | 3.76 | 824 | mp-19330   | CaMoO <sub>4</sub>                               | 4.80 |
| 782 | mp-754225  | YbTiO <sub>3</sub>                                                               | 3.78 | 825 | mp-38322   | Mg(IO <sub>3</sub> ) <sub>2</sub>                | 4.84 |
| 783 | mp-562854  | CsNb <sub>2</sub> BiO <sub>7</sub>                                               | 3.78 | 826 | mp-1220757 | NaLa(MoO <sub>4</sub> ) <sub>2</sub>             | 4.86 |
| 784 | mp-22169   | MoPbO <sub>4</sub>                                                               | 3.82 | 827 | mp-6391    | Na <sub>2</sub> ZnSiO <sub>4</sub>               | 4.90 |
| 785 | mp-1221019 | NaNb <sub>4</sub> Bi <sub>5</sub> O <sub>18</sub>                                | 3.84 | 828 | mp-16915   | BaTiOF <sub>4</sub>                              | 4.93 |
| 786 | mp-1105    | BaO <sub>2</sub>                                                                 | 3.84 | 829 | mp-241     | CdF <sub>2</sub>                                 | 4.96 |
| 787 | mp-7801    | CaGeN <sub>2</sub>                                                               | 3.85 | 830 | mp-5558    | NaReO <sub>4</sub>                               | 4.97 |
| 788 | mp-23705   | Na <sub>3</sub> AlH <sub>6</sub>                                                 | 3.89 | 831 | mp-23859   | CaHCl                                            | 5.09 |
| 789 | mp-1222782 | LaPaO <sub>4</sub>                                                               | 3.93 | 832 | mp-760762  | NbOF <sub>3</sub>                                | 5.12 |
| 790 | mp-3858    | NaTaO <sub>3</sub>                                                               | 3.95 | 833 | mp-1070852 | YbHCl                                            | 5.17 |
| 791 | mp-1211901 | KLaTiO <sub>4</sub>                                                              | 3.95 | 834 | mp-18834   | SrMoO <sub>4</sub>                               | 5.18 |
| 792 | mp-1223057 | LaAg(MoO <sub>4</sub> ) <sub>2</sub>                                             | 3.96 | 835 | mp-24422   | CaHBr                                            | 5.40 |
| 793 | mp-1211538 | KNdTiO <sub>4</sub>                                                              | 3.96 | 836 | mp-6406    | Na <sub>2</sub> MgSiO <sub>4</sub>               | 5.43 |

|     |            |                                                  |      |     |            |                                    |       |
|-----|------------|--------------------------------------------------|------|-----|------------|------------------------------------|-------|
| 794 | mp-1225510 | DyPaO <sub>4</sub>                               | 4.08 | 837 | mp-5295    | LaNbO <sub>4</sub>                 | 5.46  |
| 795 | mp-1223799 | HoPaO <sub>4</sub>                               | 4.09 | 838 | mp-12931   | SmTaO <sub>4</sub>                 | 5.55  |
| 796 | mp-9239    | NaLaMgTeO <sub>6</sub>                           | 4.09 | 839 | mp-12427   | Sr <sub>2</sub> TaGaO <sub>6</sub> | 5.57  |
| 797 | mp-556697  | CaTa <sub>2</sub> Bi <sub>2</sub> O <sub>9</sub> | 4.10 | 840 | mp-12932   | TbTaO <sub>4</sub>                 | 5.59  |
| 841 | mp-1183115 | AcAlO <sub>3</sub>                               | 5.59 | 862 | mp-1097916 | CsCaCl <sub>3</sub>                | 6.65  |
| 842 | mp-7703    | DyTaO <sub>4</sub>                               | 5.60 | 863 | mp-1070599 | CsYbCl <sub>3</sub>                | 6.73  |
| 843 | mp-5985    | HoTaO <sub>4</sub>                               | 5.61 | 864 | mp-7571    | KNbF <sub>6</sub>                  | 7.04  |
| 844 | mp-3444    | ErTaO <sub>4</sub>                               | 5.62 | 865 | mp-1213993 | CaAs <sub>2</sub> F <sub>12</sub>  | 7.16  |
| 845 | mp-5377    | YTaO <sub>4</sub>                                | 5.64 | 866 | mp-643759  | GaH <sub>3</sub> NF <sub>3</sub>   | 7.28  |
| 846 | mp-754969  | TmBrO                                            | 5.64 | 867 | mp-5078    | SrZnF <sub>4</sub>                 | 7.34  |
| 847 | mp-1206859 | ErBrO                                            | 5.69 | 868 | mp-632326  | HCl                                | 7.42  |
| 848 | mp-29327   | SmBrO                                            | 5.77 | 869 | mp-557483  | YbClF                              | 7.45  |
| 849 | mp-1178160 | HoBrO                                            | 5.80 | 870 | mp-463     | KF                                 | 7.91  |
| 850 | mp-643     | ThO <sub>2</sub>                                 | 6.15 | 871 | mp-8537    | S(OH) <sub>2</sub>                 | 7.94  |
| 851 | mp-632229  | HBr                                              | 6.25 | 872 | mp-8416    | BaCaGaF <sub>7</sub>               | 8.03  |
| 852 | mp-28567   | LiBiF <sub>4</sub>                               | 6.27 | 873 | mp-1540904 | KTaF <sub>6</sub>                  | 8.27  |
| 853 | mp-7405    | SmAlO <sub>3</sub>                               | 6.29 | 874 | mp-972825  | SiH <sub>8</sub>                   | 8.67  |
| 854 | mp-1025185 | Cs <sub>2</sub> CaCl <sub>4</sub>                | 6.30 | 875 | mp-674459  | NaErF <sub>4</sub>                 | 8.99  |
| 855 | mp-34337   | H <sub>4</sub> NCl                               | 6.33 | 876 | mp-675798  | NaHoF <sub>4</sub>                 | 9.00  |
| 856 | mp-1078265 | Cs <sub>2</sub> YbCl <sub>4</sub>                | 6.34 | 877 | mp-2955    | NaMgF <sub>3</sub>                 | 9.02  |
| 857 | mp-1213703 | Cs <sub>3</sub> Ca <sub>2</sub> Cl <sub>7</sub>  | 6.39 | 878 | mp-34081   | NaYF <sub>4</sub>                  | 9.04  |
| 858 | mp-1207669 | TmOF                                             | 6.53 | 879 | mp-18065   | BaCaAlF <sub>7</sub>               | 9.13  |
| 859 | mp-1210775 | LuOF                                             | 6.57 | 880 | mp-2741    | CaF <sub>2</sub>                   | 9.18  |
| 860 | mp-27478   | Na <sub>3</sub> PaF <sub>8</sub>                 | 6.59 | 881 | mp-1818    | SiF <sub>4</sub>                   | 10.04 |
| 861 | mp-29731   | HoClO                                            | 6.61 |     |            |                                    |       |

Figure S1. The chemical structures for the 11 final-candidate made with VESTA.

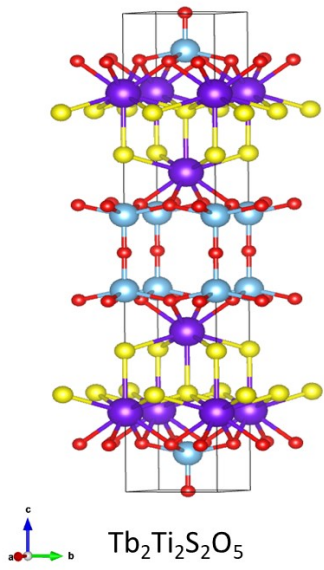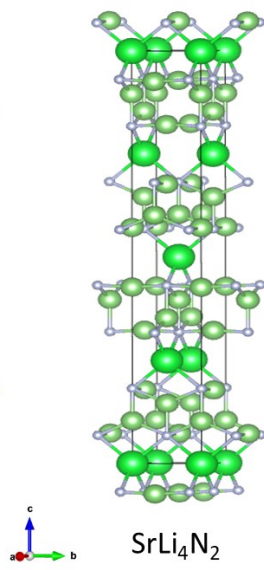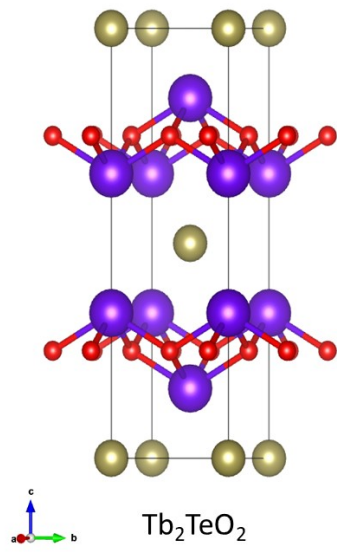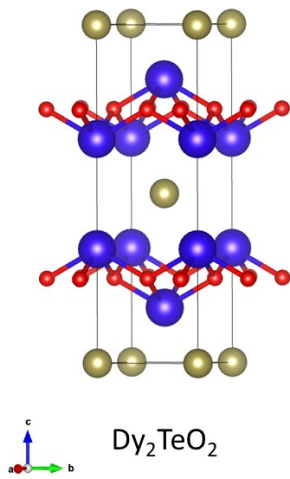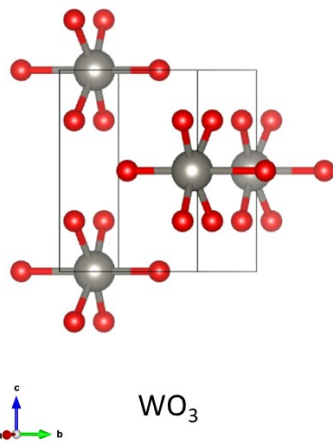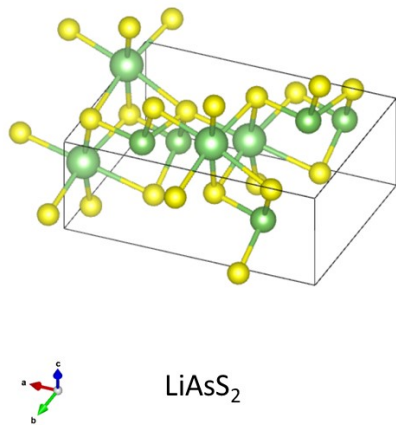

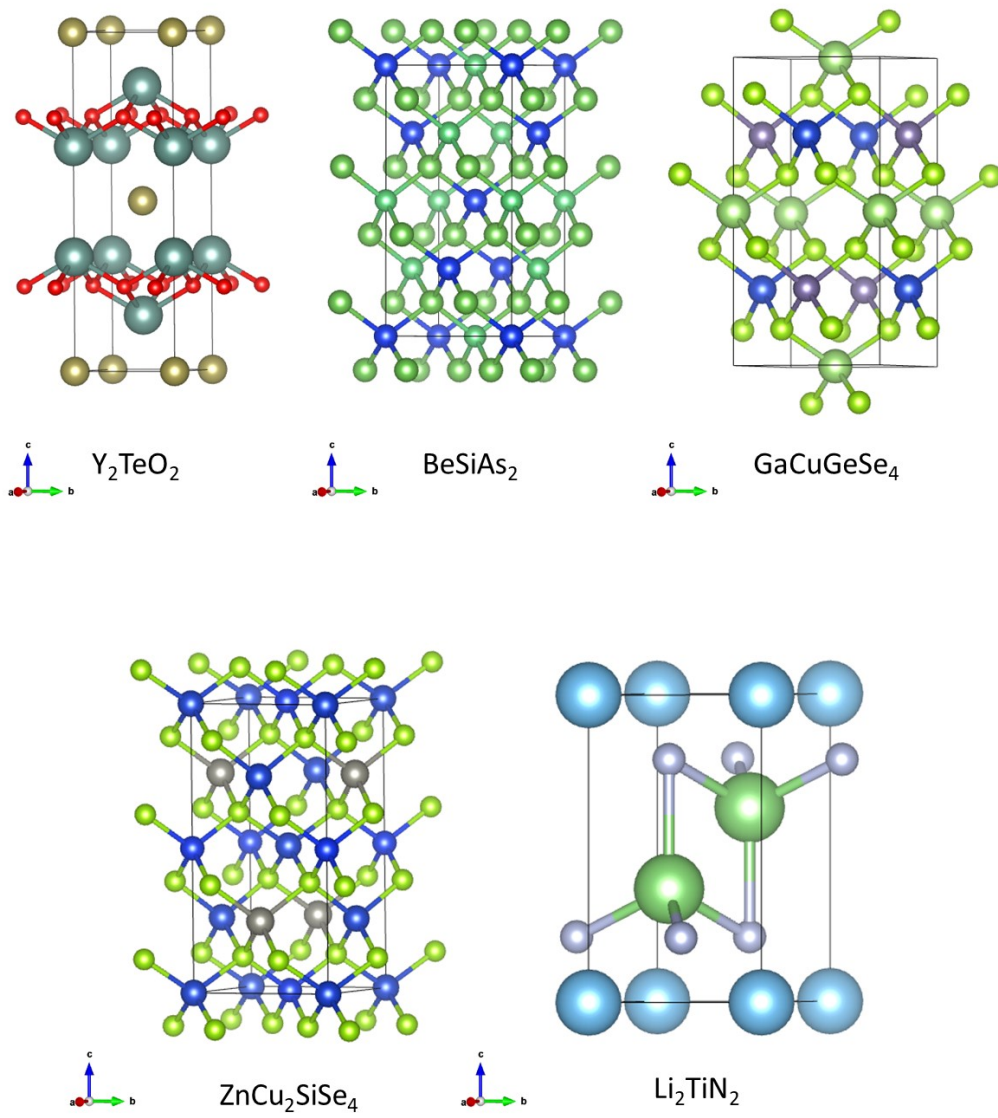

Figure S2. The phonon spectrums for the 11 final-candidate.

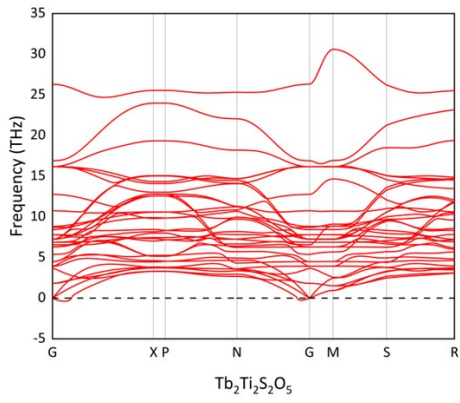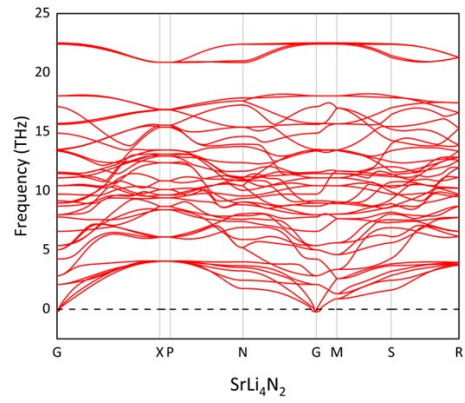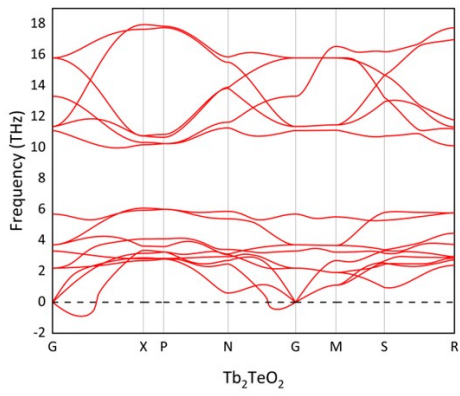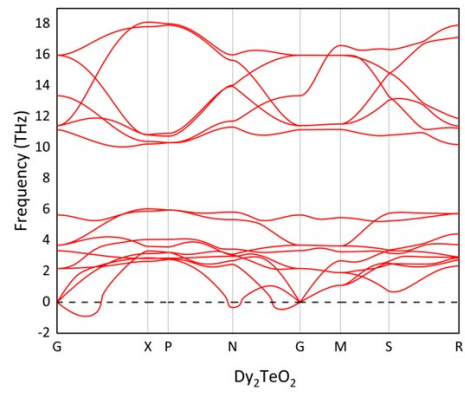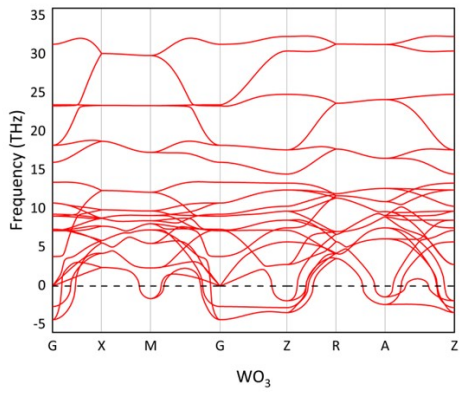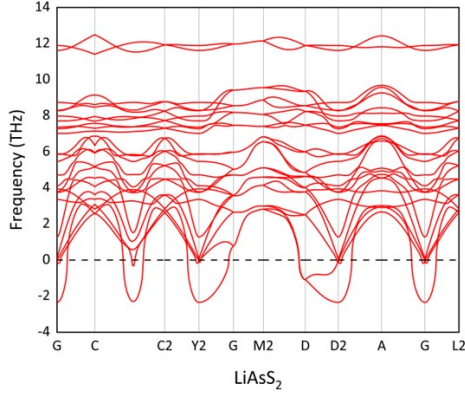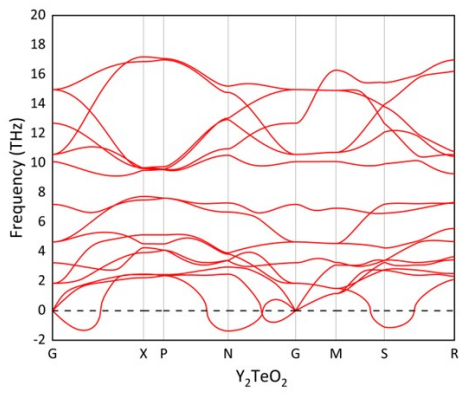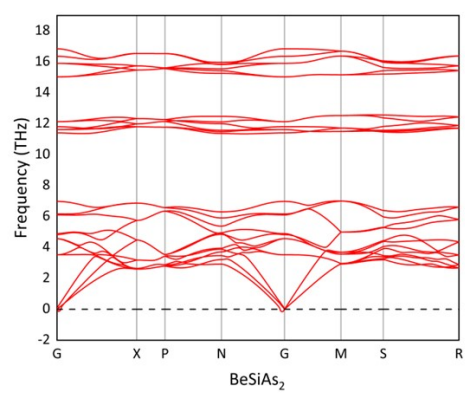

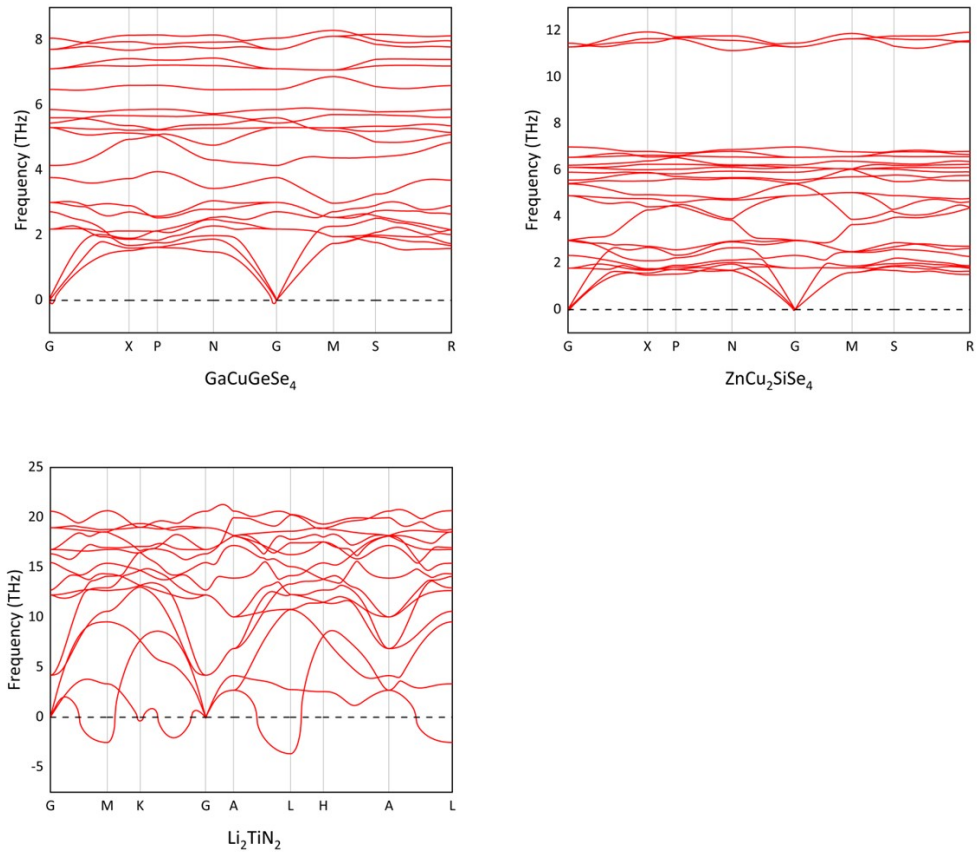

Figure S3. The band structures for the 11 final-candidate.

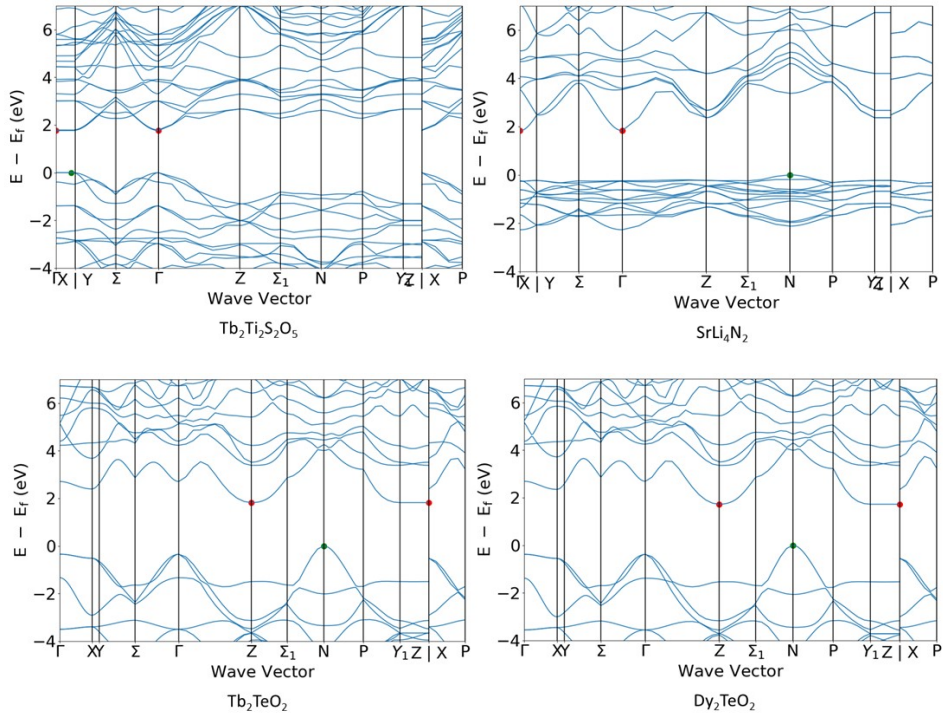

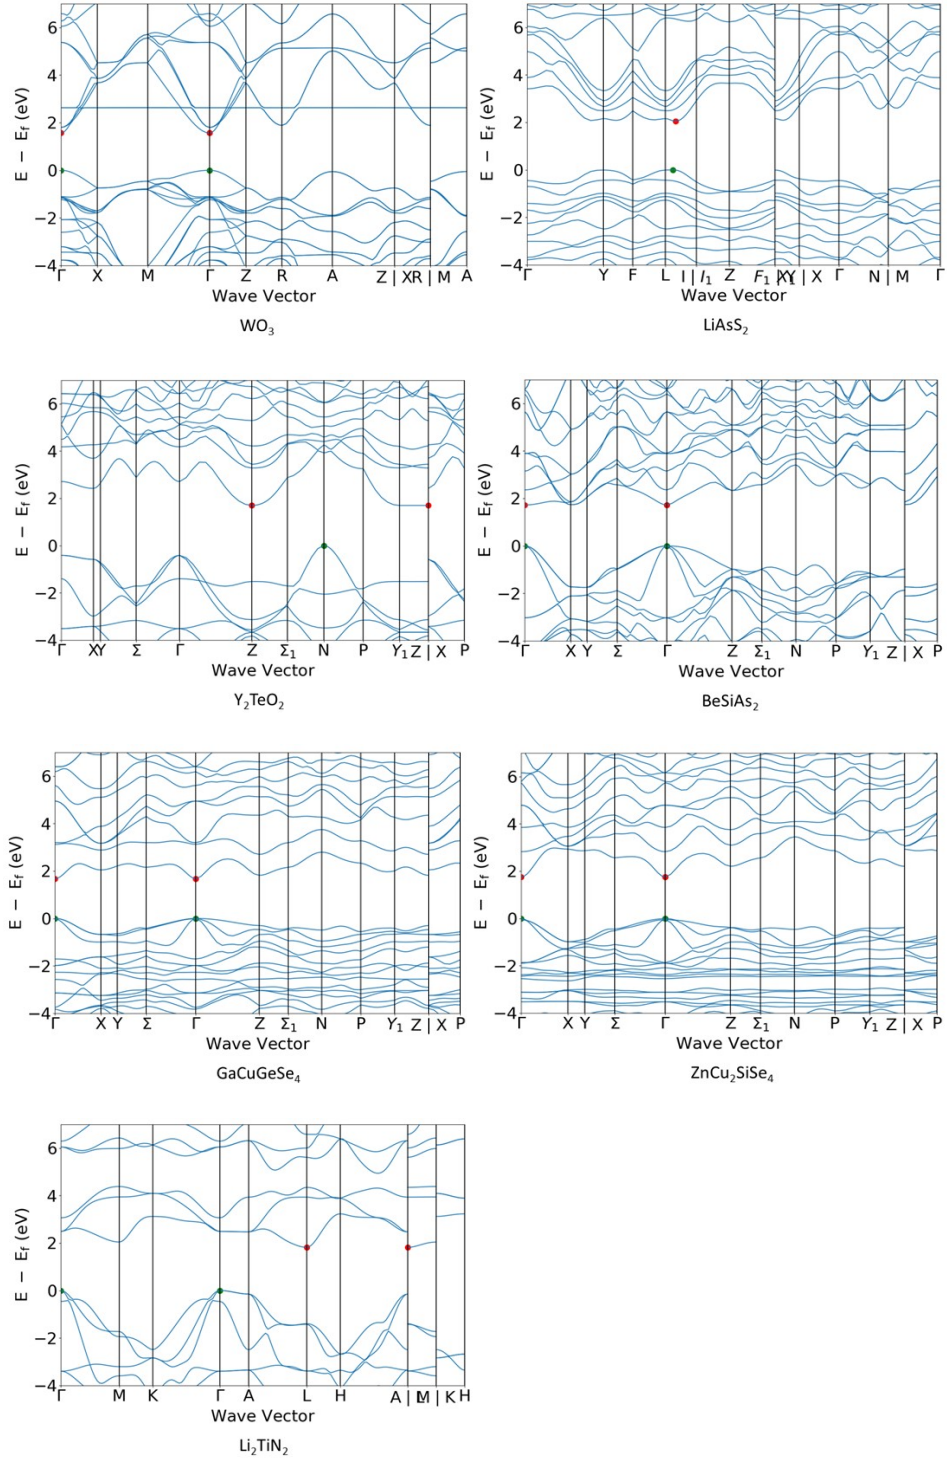

Figure S4. The light absorption coefficients calculated for the 11 final-candidate material as a function of energy. The HSE06 bandgap energy is indicated for each case.



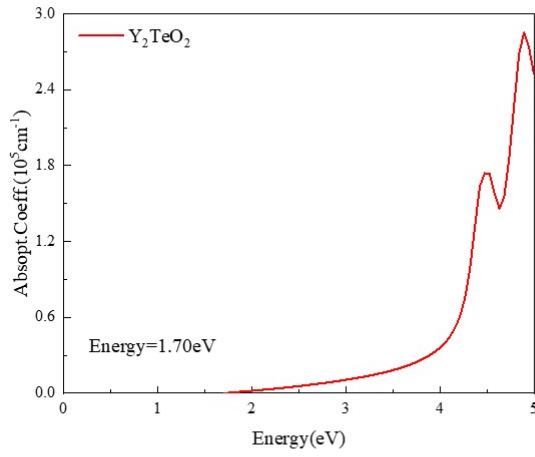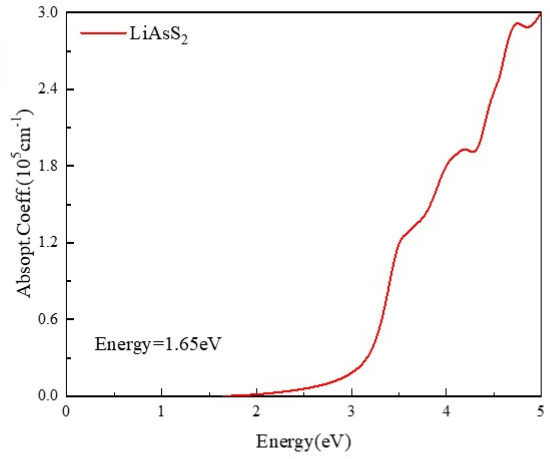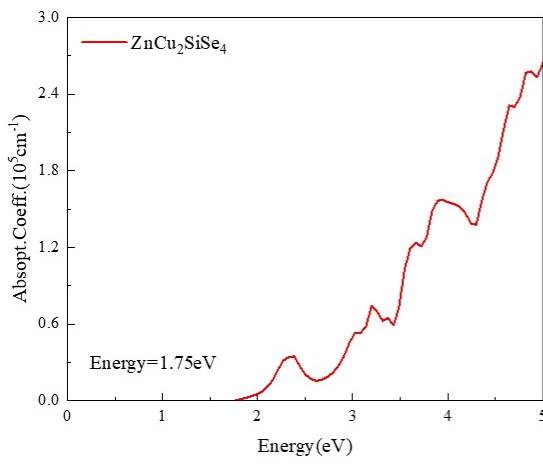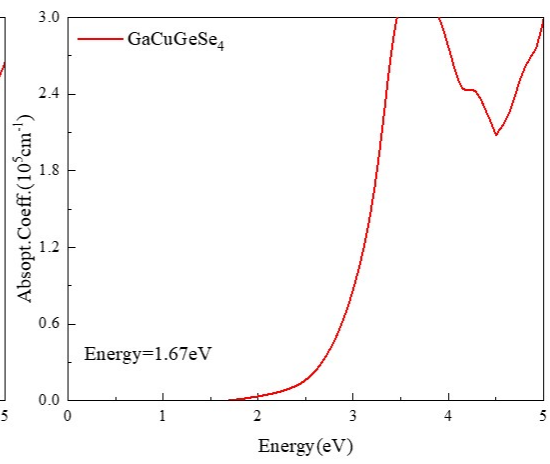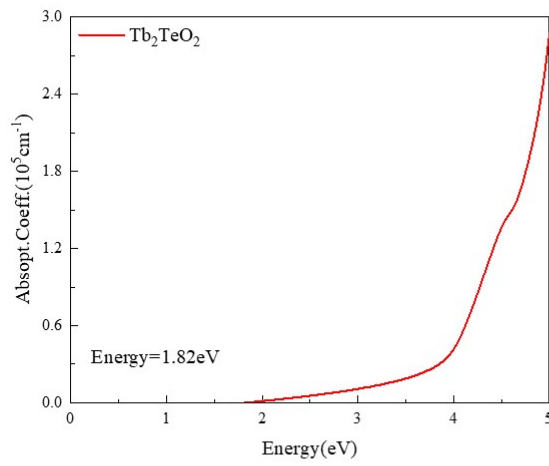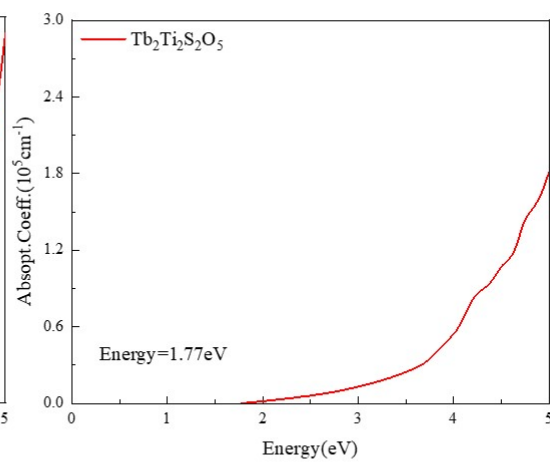

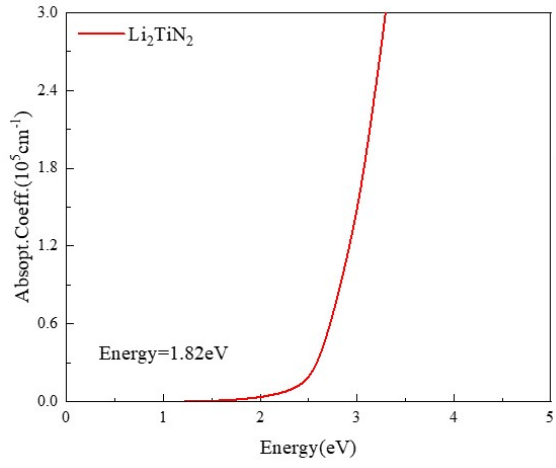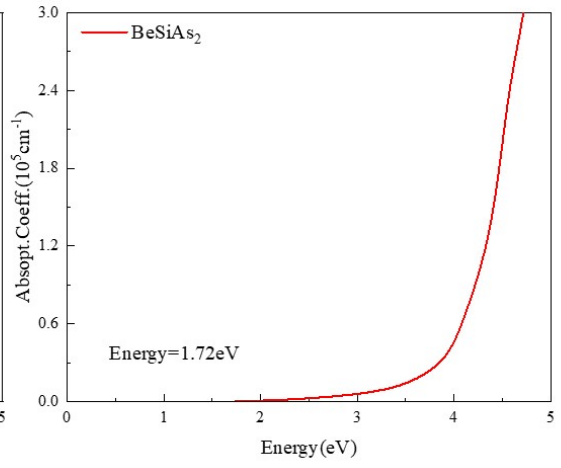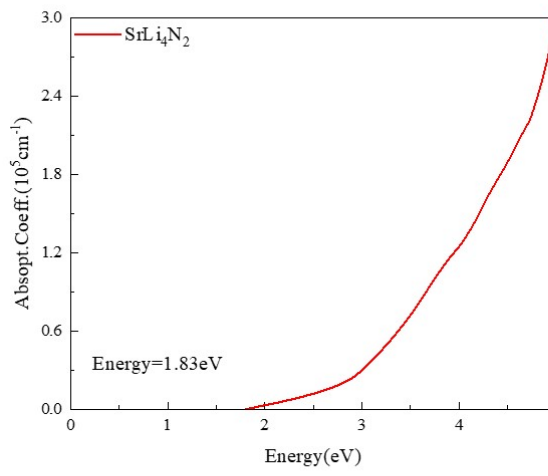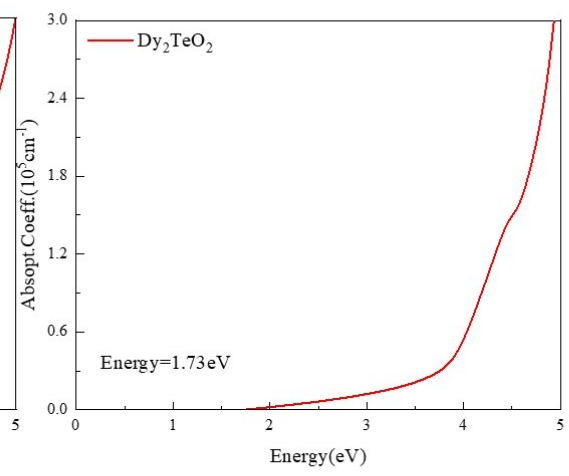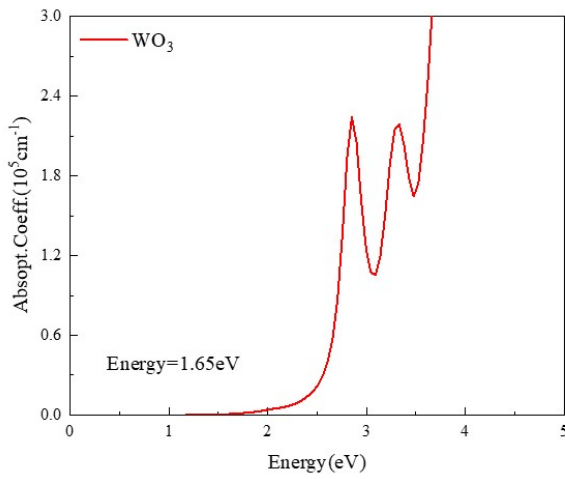

Supplement: d2se01350a2.pdf [file d2se01350a2.pdf]
